# Supplementary material for: Spiroamentotaxols A–D: unprecedented 6/6/6/5/6/6/6/6 spiro-octacyclic bis-diterpene heterodimers from the endangered conifer Amentotaxus yunnanensis and their bioactivities
Source: Royal Society of Chemistry journal article supplement (doi:10.1039/d4qo02210f), 2025-01-01
Supplement: d4qo02210f1.pdf [file d4qo02210f1.pdf]

## **Spiroamentotaxols A–D: Unprecedented 6/6/6/5/6/6/6/6 spiro-octacyclic bis-diterpene heterodimers from the endangered conifer *Amentotaxus yunnanensis* and their bioactivities**

Peng-Jun Zhou, ‡<sup>a,b,c</sup> Ze-Yu Zhao, ‡<sup>a,c</sup> Sha Chen,<sup>d</sup> Gong-Pu Luo,<sup>d</sup> Jin-Xin Zhu,<sup>a</sup> Xu-Wen Li,<sup>d</sup> Yeun-Mun Choo,<sup>e</sup> Mark T. Hamann,<sup>f</sup> Juan Xiong<sup>c</sup> and Jin-Feng Hu<sup>\*a,b,c</sup>

<sup>a</sup> *Institute of Natural Medicine and Health Products, School of Pharmaceutical Sciences, Zhejiang Provincial Key Laboratory of Plant Evolutionary Ecology and Conservation, Taizhou University, Zhejiang 318000, PR China*

<sup>b</sup> *School of Chemical Engineering, Sichuan University of Science & Engineering, Zigong 643000, PR China*

<sup>c</sup> *School of Pharmacy, Fudan University, Shanghai 201203, PR China*

<sup>d</sup> *Shandong Laboratory of Yantai Drug Discovery, Bohai Rim Advanced Research Institute for Drug Discovery, Yantai 264117, PR China*

<sup>e</sup> *Department of Chemistry, University of Malaya, 50603 Kuala Lumpur, Malaysia*

<sup>f</sup> *Department of Drug Discovery, Biomedical Sciences & Public Colleges of Pharmacy and Medicine, Medical University of South Carolina, 29466 USA*

‡These authors contributed equally to this work.

\* Corresponding author at: Taizhou University, Taizhou 318000, PR China (J.-F. Hu),  
*E-mail addresses:* jfhu@tzc.edu.cn & jfhu@fudan.edu.cn (J.-F. Hu)

---

## List of Contents

|                                                                                                      |       |
|------------------------------------------------------------------------------------------------------|-------|
| <b>Experimental details</b>                                                                          |       |
| 1.1 General experimental procedures                                                                  | 3     |
| 1.2 LC-ESI-MS analysis of <i>A. yunnanensis</i> extract                                              | 3–4   |
| <b>Figures and Tables</b>                                                                            |       |
| <b>Figure S1.</b> 2D NMR correlations of compounds <b>2–4</b> .                                      | 4     |
| <b>Figure S2.</b> Calculated and experimental ECD spectra of compounds <b>1–3</b> in MeOH.           | 5     |
| <b>Figure S3.</b> Calculated and experimental ECD spectra of compound <b>4</b> in MeOH.              | 5     |
| <b>Figure S4.</b> MoIN of <i>A. yunnanensis</i> MeOH extract.                                        | 6     |
| <b>Table S1.</b> <sup>1</sup> H and <sup>13</sup> C NMR data for compounds <b>1a</b> and <b>1b</b> . | 7     |
| <b>Tables S2–S4.</b> X-ray crystallographic data for <b>1</b> , <b>2</b> , and <b>1a</b> .           | 8–10  |
| <b>Figures S5–S8</b> and <b>Tables S5–S8.</b> ECD calculations of <b>1–4</b> .                       | 11–14 |
| <b>Figure S9.</b> LC-ESI-MS analysis of 90% MeOH/H <sub>2</sub> O extract.                           | 15    |
| <b>Figure S10.</b> LC-ESI-MS analysis of EtOAc extract.                                              | 16    |
| <b>Figures S11–S17.</b> 1D/2D NMR and HRESIMS spectra for compound <b>1</b>                          | 17–20 |
| <b>Figure S18.</b> IR spectrum of compound <b>1</b> .                                                | 20    |
| <b>Figures S19–S25.</b> 1D/2D NMR and HRESIMS spectra for compound <b>2</b>                          | 21–24 |
| <b>Figure S26.</b> IR spectrum of compound <b>2</b> .                                                | 24    |
| <b>Figures S27–S33.</b> 1D/2D NMR and HRESIMS spectra for compound <b>3</b>                          | 25–28 |
| <b>Figure S34.</b> IR spectrum of compound <b>3</b> .                                                | 28    |
| <b>Figures S35–S41.</b> 1D/2D NMR and HRESIMS spectra for compound <b>4</b>                          | 29–32 |
| <b>Figures S42–S44.</b> 1D NMR and HRESIMS spectra for compound <b>1a</b>                            | 32–33 |
| <b>Figures S45–S47.</b> 1D NMR and HRESIMS spectra for compound <b>1b</b>                            | 34–35 |

## 1. Experimental details

### 1.1 General experimental procedures

NMR spectra were recorded on a Bruker Avance III 400 MHz or 600 MHz spectrometer. Chemical shifts are expressed in  $\delta$  (ppm) and referenced to the residual solvent signals. Semi-preparative HPLC was conducted on a Shimadzu LH-20AT system with a SPD-M20A prominence diode array (PDA) detector and four ODS columns (Waters X-Bridge: 250×10 mm, 5  $\mu$ m; YMC-Pack ODS-A: 250 × 10 mm, 5  $\mu$ m; Cosmosil 5C<sub>18</sub>-MS-II: 250 × 10 mm, 5  $\mu$ m; Thermo Gold PFP: 250 × 10 mm, 5  $\mu$ m). Optical rotations were measured on an Anton Paar MCP 4100 automatic polarimeter. IR spectrum was measured on a Nicolet 5700 FTIR spectrometer. ECD spectra were recorded on a JASCO-1500 spectropolarimeter. HRESIMS were acquired on AB SCIEX Triple TOF 5600 spectrometer. X-ray data were collected on a Bruker D8 Venture diffractometer. Melting points were obtained on a Melting Point Apparatus WRX-4 (Shanghai Yice Apparatus & Equipments CO. Ltd., PR China). Column chromatography (CC) was carried out using silica gel (100–200 or 200–300 mesh, Qingdao Marine Chemical Co. Ltd., PR China), MCI gel CHP20P (75–150  $\mu$ m, Mitsubishi Chemical Industries, Tokyo, Japan), and Sephadex LH-20 (GE Healthcare Bio-Sciences AB, Uppsala, Sweden).

### 1.2 LC-ESI-MS analysis of *A. yunnanensis* extract

Fresh twigs and needles (80 g) of *A. yunnanensis* were extracted using 90% MeOH at room temperature three times (twelve hours soaking for each time), and the combined extracts were concentrated in vacuo to give a residue (6.7 g). The residue was analyzed using a Shimadzu LC-20A system coupled to a Shimadzu LCMS-2020 mass spectrometer. LC-MS was performed using a Shim-pack GISI-HP column (C<sub>18</sub>, 3  $\mu$ m, 2.1×150 mm) with a flow rate of 0.2 mL/min, and the column temperature was maintained at 40°C. The mobile phase consisted of H<sub>2</sub>O (A) and MeOH (B) with a linear gradient: 40–40% B (0.0–5.0 min); 40–100% B (5.1–25.0 min); 100–100% B (25.1–45.0 min). The analysis of the LC-MS data is shown in **Figure S9**.

Another 80 g sample of twigs and needles from *A. yunnanensis* was extracted with ethyl acetate (EtOAc) using ultrasonic treatment at room temperature, repeated three times with each extraction lasting twelve hours. The combined extracts were then concentrated in vacuo to give a residue (3.1 g). The residue was analyzed using a

Shimadzu LC-20A system coupled with a Shimadzu LCMS-2020 mass spectrometer. LC-MS was performed using the same Shim-pack GISI-HP column ( $C_{18}$ ,  $3\ \mu\text{m}$ ,  $2.1 \times 150\ \text{mm}$ ) at a flow rate of  $0.2\ \text{mL}/\text{min}$ , with the column temperature maintained at  $40^\circ\text{C}$ . The mobile phase consisted of  $\text{H}_2\text{O}$  (A) and  $\text{MeOH}$  (B) with a linear gradient: 40–100% B (0.0–30.0 min); 100–100% B (30.1–50.0 min). The analysis of the LC-MS data is shown in **Figure S10**. The spiroamentotaxols were detected in both the  $\text{MeOH}$  and  $\text{EtOAc}$  extracts. These findings support the conclusion that these heterodimers are genuine natural products, rather than artifacts resulting from the isolation procedures.

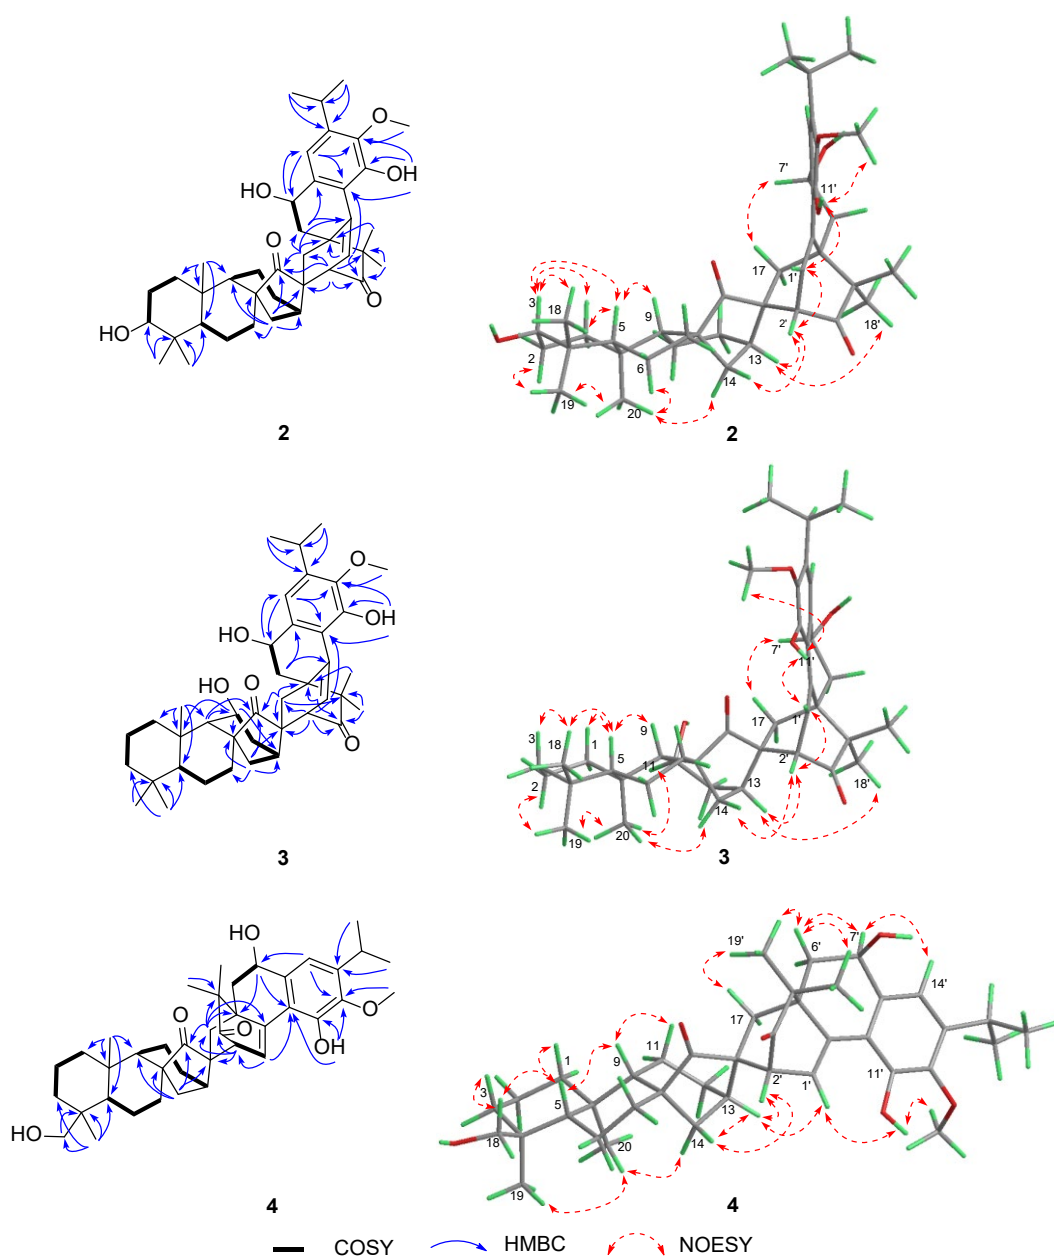

**Figure S1.** 2D NMR correlations of compounds 2–4.

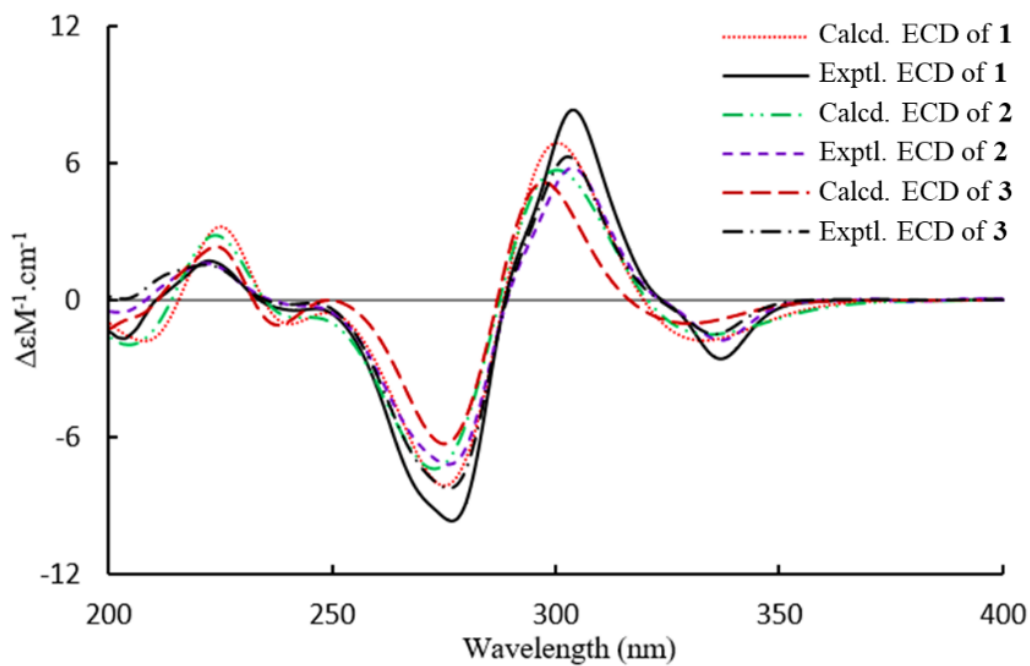

**Figure S2.** Calculated and experimental ECD spectra of compounds 1–3 (in MeOH).

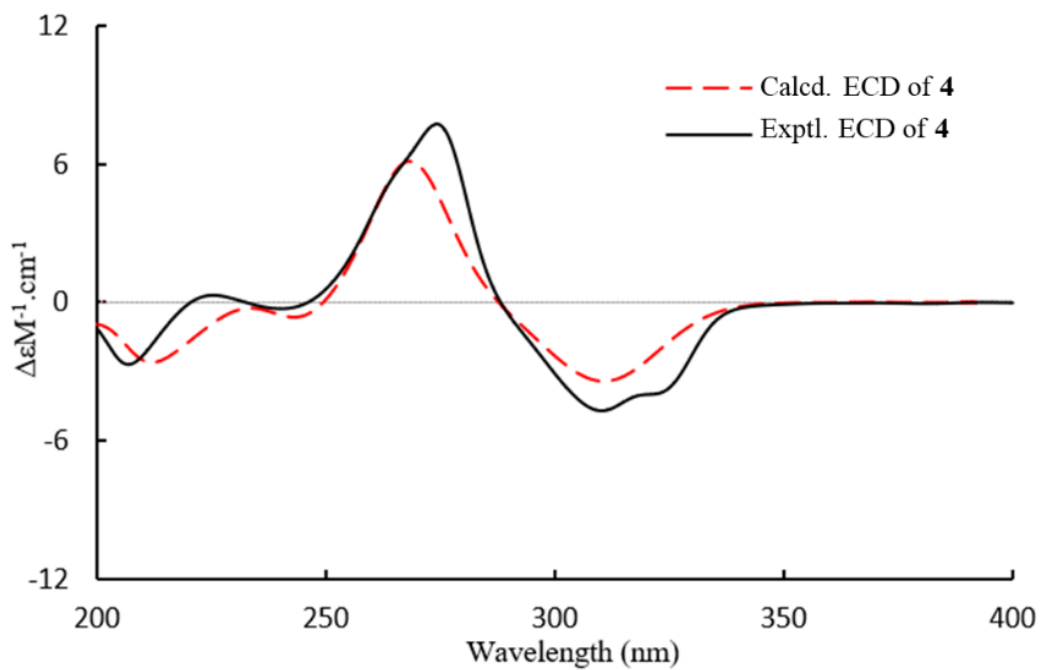

**Figure S3.** Calculated and experimental ECD spectra of compound 4 (in MeOH).

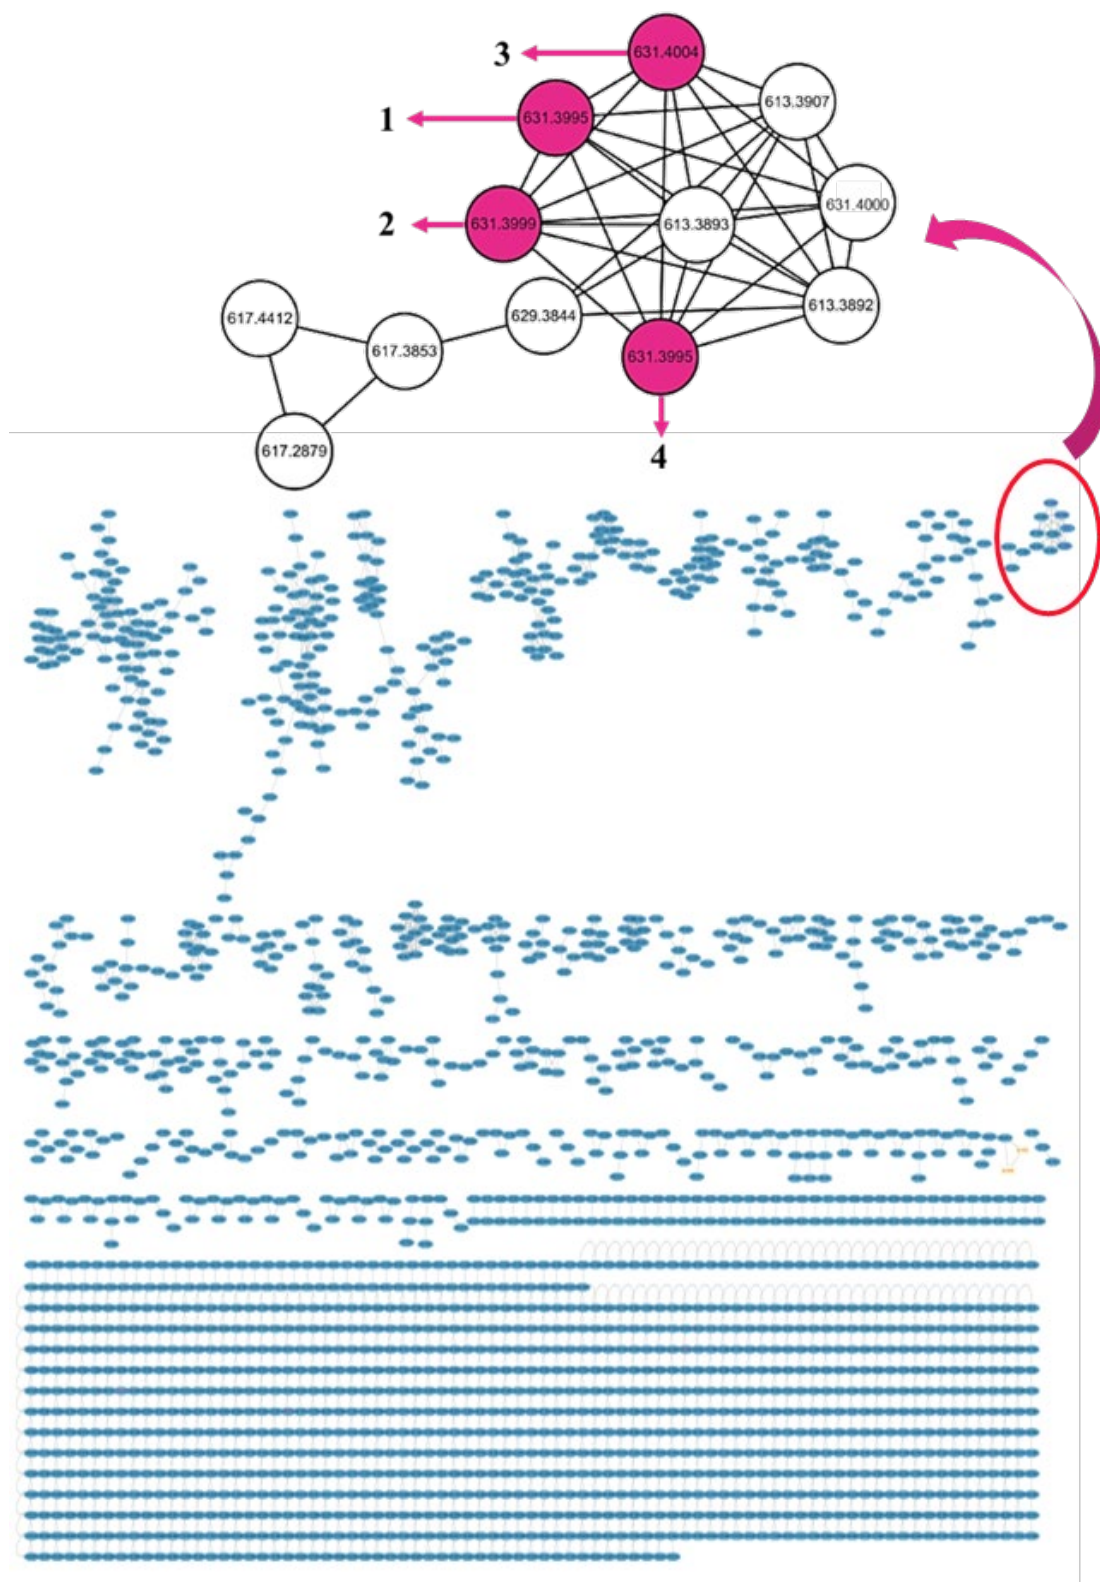

**Figure S4.** MoIN of *A. yunnanensis* MeOH extract. (underneath): Organized landscape of the complete network. (above): Molecular cluster of the predicted heterodimers.

**Table S1.** <sup>1</sup>H NMR (400 MHz) and <sup>13</sup>C NMR (100 MHz) data ( $\delta$  in ppm,  $J$  in Hz, in CDCl<sub>3</sub>) of compounds **1a** and **1b**.<sup>a</sup>

| No.              | <b>1a</b>                             |                     | <b>1b</b>                                                                      |                     |
|------------------|---------------------------------------|---------------------|--------------------------------------------------------------------------------|---------------------|
|                  | $\delta_{\text{H}}$                   | $\delta_{\text{C}}$ | $\delta_{\text{H}}$                                                            | $\delta_{\text{C}}$ |
| 1                | $\alpha$ : 1.72, m; $\beta$ : 0.73, m | 38.9                | $\alpha$ : 1.73, m; $\beta$ : 0.73, m                                          | 38.8                |
| 2                | $\alpha$ : 1.19, m; $\beta$ : 1.33, m | 18.6                | $\alpha$ : 1.17, m; $\beta$ : 1.30, m                                          | 18.7                |
| 3                | $\alpha$ : 1.28, m; $\beta$ : 1.36, m | 35.1                | $\alpha$ : 1.26, m; $\beta$ : 1.38, m                                          | 35.0                |
| 4                |                                       | 37.5                |                                                                                | 37.4                |
| 5                | 1.19, br d (12.1)                     | 48.6                | 1.19, br d (12.5)                                                              | 48.5                |
| 6 $\alpha$       | $\alpha$ : 1.47, m                    | 17.6                | $\alpha$ : 1.49, m                                                             | 17.6                |
| 6 $\beta$        | $\beta$ : 1.62, m                     |                     | $\beta$ : 1.63, m                                                              |                     |
| 7                | $\alpha$ : 1.81, m; $\beta$ : 1.81, m | 27.6                | $\alpha$ : 1.80, m; $\beta$ : 1.80, m                                          | 27.6                |
| 8                |                                       | 52.1                |                                                                                | 52.1                |
| 9                | 1.08, m                               | 52.9                | 1.10, m                                                                        | 53.0                |
| 10               |                                       | 39.6                |                                                                                | 39.6                |
| 11               | $\alpha$ : 1.64, m; $\beta$ : 1.31, m | 18.4                | $\alpha$ : 1.64, m; $\beta$ : 1.31, m                                          | 18.4                |
| 12               | $\alpha$ : 1.88, m; $\beta$ : 1.32, m | 34.4                | $\alpha$ : 1.86, m; $\beta$ : 1.31, m                                          | 34.4                |
| 13               | 2.15, br s                            | 38.4                | 2.18, br d (2.6)                                                               | 38.6                |
| 14 $\alpha$      | 2.43, br d (12.1)                     | 35.2                | 2.40, br d (12.5)                                                              | 35.0                |
| 14 $\beta$       | 1.83, br d (12.1)                     |                     | 1.82, br d (12.5)                                                              |                     |
| 15               |                                       | 221.1               |                                                                                | 221.7               |
| 16               |                                       | 48.3                |                                                                                | 51.8                |
| 17               | 2.02, d (13.1); 1.79, d (13.1)        | 36.3                | 2.18, d (13.0); 1.67, d (13.0)                                                 | 33.8                |
| 18               | 0.77, s                               | 17.3                | 0.75, s                                                                        | 17.3                |
| 19               | 3.40, d (11.0); 3.12, d (11.0)        | 72.1                | 3.38, d (11.2); 3.07, d (11.2)                                                 | 72.0                |
| 20               | 1.12, s                               | 17.9                | 1.11, s                                                                        | 17.9                |
| 1'               | 7.13, d (7.0)                         | 120.1               | 6.62, d (6.7)                                                                  | 119.0               |
| 2'               | 3.32, d (7.0)                         | 53.6                | 3.23, d (6.7)                                                                  | 52.9                |
| 3'               |                                       | 213.2               |                                                                                | 214.4               |
| 4'               |                                       | 46.7                |                                                                                | 47.3                |
| 5'               |                                       | 50.0                |                                                                                | 47.4                |
| 6'               | 5.80, d (9.8)                         | 128.1               | $\alpha$ : 1.70, br dd (15.0, 14.3)<br>$\beta$ : 1.88, br dd (15.0, 6.9)       | 27.9                |
| 7'               | 6.53, d (9.8)                         | 128.8               | $\alpha$ : 2.66, ddd (15.2, 6.9, 3.7)<br>$\beta$ : 2.81, ddd (15.2, 14.3, 4.4) | 27.6                |
| 8'               |                                       | 128.9               |                                                                                | 139.7               |
| 9'               |                                       | 114.4               |                                                                                | 118.9               |
| 10'              |                                       | 143.3               |                                                                                | 143.8               |
| 11'              |                                       | 147.6               |                                                                                | 146.7               |
| 12'              |                                       | 144.2               |                                                                                | 142.7               |
| 13'              |                                       | 140.3               |                                                                                | 139.7               |
| 14'              | 6.56, s                               | 117.2               | 6.54, s                                                                        | 116.2               |
| 15'              | 3.23, m                               | 26.6                | 3.23, m                                                                        | 26.5                |
| 16'              | 1.25, d (6.5)                         | 23.7                | 1.24, d (6.5)                                                                  | 23.9                |
| 17'              | 1.25, d (6.5)                         | 23.4                | 1.24, d (6.5)                                                                  | 23.5                |
| 18'              | 1.09, s                               | 19.6                | 1.05, s                                                                        | 20.3                |
| 19'              | 0.93, s                               | 25.4                | 0.98, s                                                                        | 24.9                |
| OCH <sub>3</sub> | 3.81, s                               | 62.0                | 3.78, s                                                                        | 61.8                |

<sup>a</sup>Assignments were made by a combination of 1D and 2D NMR experiments.

**Table S2.** X-ray crystallographic data for **1**.

|                                   |                                                                          |                              |
|-----------------------------------|--------------------------------------------------------------------------|------------------------------|
| Identification code               | 231116zpj_yns_27                                                         |                              |
| Empirical formula                 | 1/4(2.C <sub>40</sub> H <sub>54</sub> O <sub>6</sub> .3H <sub>2</sub> O) |                              |
| Formula weight                    | 328.93                                                                   |                              |
| Temperature                       | 173.00 K                                                                 |                              |
| Wavelength                        | 1.34139 Å                                                                |                              |
| Crystal system                    | Triclinic                                                                |                              |
| Space group                       | P1                                                                       |                              |
| Unit cell dimensions              | a = 7.3136(4) Å                                                          | $\alpha = 79.809(3)^\circ$ . |
|                                   | b = 11.2985(5) Å                                                         | $\beta = 85.535(3)^\circ$ .  |
|                                   | c = 21.3261(11) Å                                                        | $\gamma = 88.994(3)^\circ$ . |
| Volume                            | 1729.15(15) Å <sup>3</sup>                                               |                              |
| Z                                 | 4                                                                        |                              |
| Density (calculated)              | 1.263 Mg/m <sup>3</sup>                                                  |                              |
| Absorption coefficient            | 0.436 mm <sup>-1</sup>                                                   |                              |
| F(000)                            | 714                                                                      |                              |
| Crystal size                      | 0.17 × 0.17 × 0.05 mm <sup>3</sup>                                       |                              |
| Theta range for data collection   | 3.619 to 55.155°.                                                        |                              |
| Index ranges                      | -8 ≤ h ≤ 8, -13 ≤ k ≤ 13, -25 ≤ l ≤ 25                                   |                              |
| Reflections collected             | 47022                                                                    |                              |
| Independent reflections           | 12854 [R(int) = 0.1093]                                                  |                              |
| Completeness to theta = 53.594°   | 100.0 %                                                                  |                              |
| Absorption correction             | Semi-empirical from equivalents                                          |                              |
| Max. and min. transmission        | 0.7508 and 0.5717                                                        |                              |
| Refinement method                 | Full-matrix least-squares on F <sup>2</sup>                              |                              |
| Data / restraints / parameters    | 12854 / 7 / 890                                                          |                              |
| Goodness-of-fit on F <sup>2</sup> | 1.040                                                                    |                              |
| Final R indices [I > 2σ(I)]       | R <sub>1</sub> = 0.0626, wR <sub>2</sub> = 0.1498                        |                              |
| R indices (all data)              | R <sub>1</sub> = 0.0903, wR <sub>2</sub> = 0.1647                        |                              |
| Absolute structure parameter      | 0.13(19)                                                                 |                              |
| Extinction coefficient            | n/a                                                                      |                              |
| Largest diff. peak and hole       | 0.250 and -0.332 e.Å <sup>-3</sup>                                       |                              |



**Table S3.** X-ray crystallographic data for **2**.

|                                   |                                                      |                       |
|-----------------------------------|------------------------------------------------------|-----------------------|
| Identification code               | 240717zzy                                            |                       |
| Empirical formula                 | C <sub>40</sub> H <sub>58.50</sub> O <sub>8.25</sub> |                       |
| Formula weight                    | 671.36                                               |                       |
| Temperature                       | 170.00 K                                             |                       |
| Wavelength                        | 1.34139 Å                                            |                       |
| Crystal system                    | Orthorhombic                                         |                       |
| Space group                       | P2 <sub>1</sub> 2 <sub>1</sub> 2 <sub>1</sub>        |                       |
| Unit cell dimensions              | a = 11.9633(5) Å                                     | $\alpha = 90^\circ$ . |
|                                   | b = 14.1368(6) Å                                     | $\beta = 90^\circ$ .  |
|                                   | c = 43.3418(19) Å                                    | $\gamma = 90^\circ$ . |
| Volume                            | 7330.1(5) Å <sup>3</sup>                             |                       |
| Z                                 | 8                                                    |                       |
| Density (calculated)              | 1.217 Mg/m <sup>3</sup>                              |                       |
| Absorption coefficient            | 0.427 mm <sup>-1</sup>                               |                       |
| F(000)                            | 2916                                                 |                       |
| Crystal size                      | 0.17 × 0.17 × 0.05 mm <sup>3</sup>                   |                       |
| Theta range for data collection   | 2.860 to 54.960°.                                    |                       |
| Index ranges                      | -14 ≤ h ≤ 14, -17 ≤ k ≤ 16, -52 ≤ l ≤ 51             |                       |
| Reflections collected             | 84677                                                |                       |
| Independent reflections           | 13910 [R(int) = 0.1283]                              |                       |
| Completeness to theta = 53.594°   | 99.8 %                                               |                       |
| Absorption correction             | Semi-empirical from equivalents                      |                       |
| Max. and min. transmission        | 0.7508 and 0.5142                                    |                       |
| Refinement method                 | Full-matrix least-squares on F <sup>2</sup>          |                       |
| Data / restraints / parameters    | 13910 / 1 / 905                                      |                       |
| Goodness-of-fit on F <sup>2</sup> | 1.033                                                |                       |
| Final R indices [I > 2σ(I)]       | R <sub>1</sub> = 0.0733, wR <sub>2</sub> = 0.1914    |                       |
| R indices (all data)              | R <sub>1</sub> = 0.1118, wR <sub>2</sub> = 0.2173    |                       |
| Absolute structure parameter      | 0.17(18)                                             |                       |
| Extinction coefficient            | n/a                                                  |                       |
| Largest diff. peak and hole       | 0.461 and -0.285 e. Å <sup>-3</sup>                  |                       |

**Table S4.** X-ray crystallographic data for **1a**.

|                                   |                                                                                                          |
|-----------------------------------|----------------------------------------------------------------------------------------------------------|
| Identification code               | 240522zpj_27r1                                                                                           |
| Empirical formula                 | C <sub>40</sub> H <sub>52</sub> O <sub>5</sub>                                                           |
| Formula weight                    | 612.81                                                                                                   |
| Temperature                       | 170.00 K                                                                                                 |
| Wavelength                        | 1.34139 Å                                                                                                |
| Crystal system                    | Monoclinic                                                                                               |
| Space group                       | P 1 2 <sub>1</sub> 1                                                                                     |
| Unit cell dimensions              | a = 7.4099(5)Å      α = 90°.<br>b = 11.3371(8) Å      β = 94.441(4)°.<br>c = 19.5146(14) Å      γ = 90°. |
| Volume                            | 1634.4(2) Å <sup>3</sup>                                                                                 |
| Z                                 | 2                                                                                                        |
| Density (calculated)              | 1.245 Mg/m <sup>3</sup>                                                                                  |
| Absorption coefficient            | 0.402 mm <sup>-1</sup>                                                                                   |
| F(000)                            | 7664                                                                                                     |
| Crystal size                      | 0.17 × 0.17 × 0.05 mm <sup>3</sup>                                                                       |
| Theta range for data collection   | 3.926 to 54.936°.                                                                                        |
| Index ranges                      | -9<=h<=9, -13<=k<=13, -23<=l<=23                                                                         |
| Reflections collected             | 30184                                                                                                    |
| Independent reflections           | 6174 [R(int) = 0.0761]                                                                                   |
| Completeness to theta = 53.594°   | 99.8 %                                                                                                   |
| Absorption correction             | Semi-empirical from equivalents                                                                          |
| Max. and min. transmission        | 0.7508 and 0.5220                                                                                        |
| Refinement method                 | Full-matrix least-squares on F <sup>2</sup>                                                              |
| Data / restraints / parameters    | 6174 / 2 / 426                                                                                           |
| Goodness-of-fit on F <sup>2</sup> | 1.039                                                                                                    |
| Final R indices [I>2σ(I)]         | R <sub>1</sub> = 0.0485, wR <sub>2</sub> = 0.1157                                                        |
| R indices (all data)              | R <sub>1</sub> = 0.0665, wR <sub>2</sub> = 0.1272                                                        |
| Absolute structure parameter      | 0.05(19)                                                                                                 |
| Extinction coefficient            | n/a                                                                                                      |
| Largest diff. peak and hole       | 0.165 and -0.207 e.Å <sup>-3</sup>                                                                       |

● ECD calculations for 1–4.

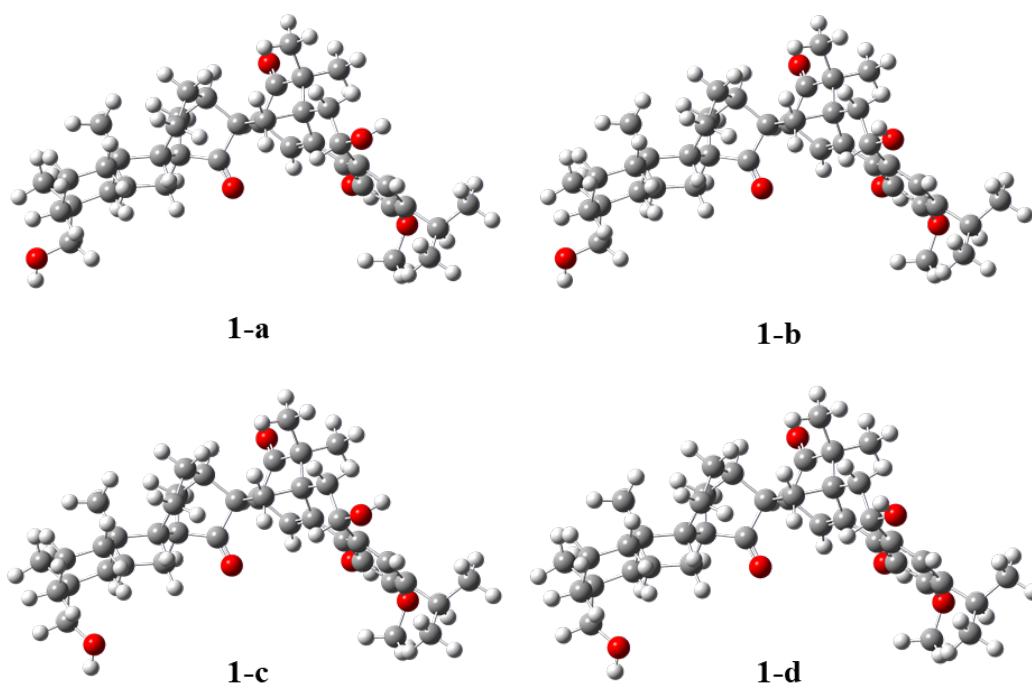

**Figure S5.** The optimized low-energy reoptimized MMFF conformers of **1** at B3LYP/6-31g level in gas.

**Table S5.** Boltzmann populations and relative binding free-energies ( $\Delta G$ ) of conformations of **1**.

| Species              | Boltzmann Population (%) | $\Delta G^\ddagger$ (kJ/mol) |
|----------------------|--------------------------|------------------------------|
| conformer <b>1-a</b> | 0.0044                   | 3.14                         |
| conformer <b>1-b</b> | 0.0005                   | 4.37                         |
| conformer <b>1-c</b> | 0.8834                   | 0                            |
| conformer <b>1-d</b> | 0.1117                   | 1.23                         |

<sup>†</sup> Relative binding free energy

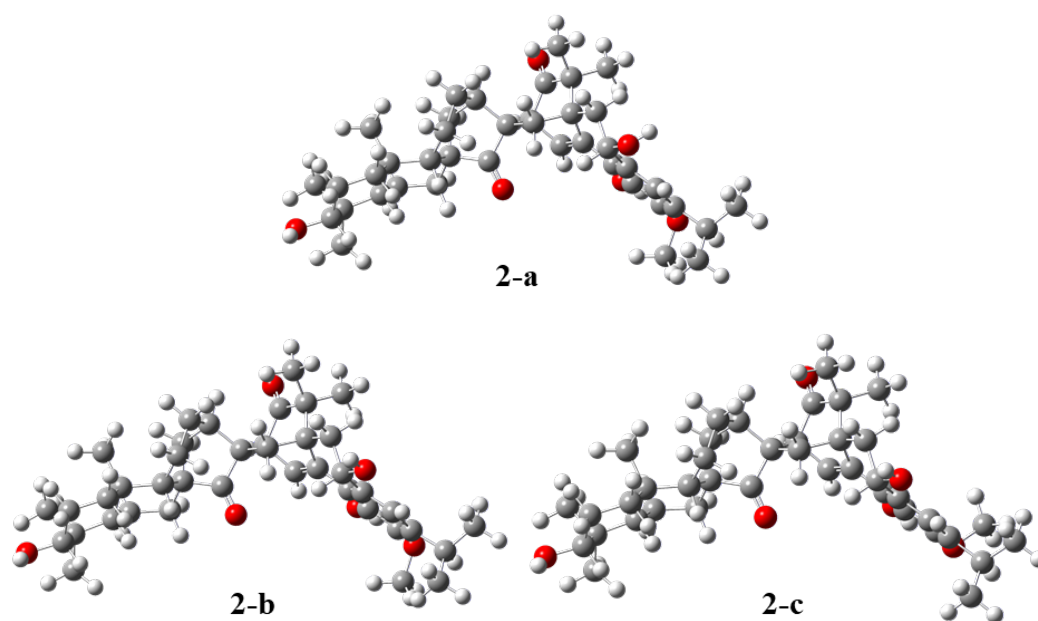

**Figure S6.** The optimized low-energy reoptimized MMFF conformers of **2** at B3LYP/6-31g level in gas.

**Table S6.** Boltzmann populations and relative binding free-energies ( $\Delta G$ ) of conformations of **2**.

| Species              | Boltzmann Population (%) | $\Delta G^\ddagger$ (kJ/mol) |
|----------------------|--------------------------|------------------------------|
| conformer <b>2-a</b> | 0.8667                   | 0                            |
| conformer <b>2-b</b> | 0.0935                   | 1.32                         |
| conformer <b>2-c</b> | 0.0398                   | 1.82                         |

<sup>†</sup> Relative binding free energy

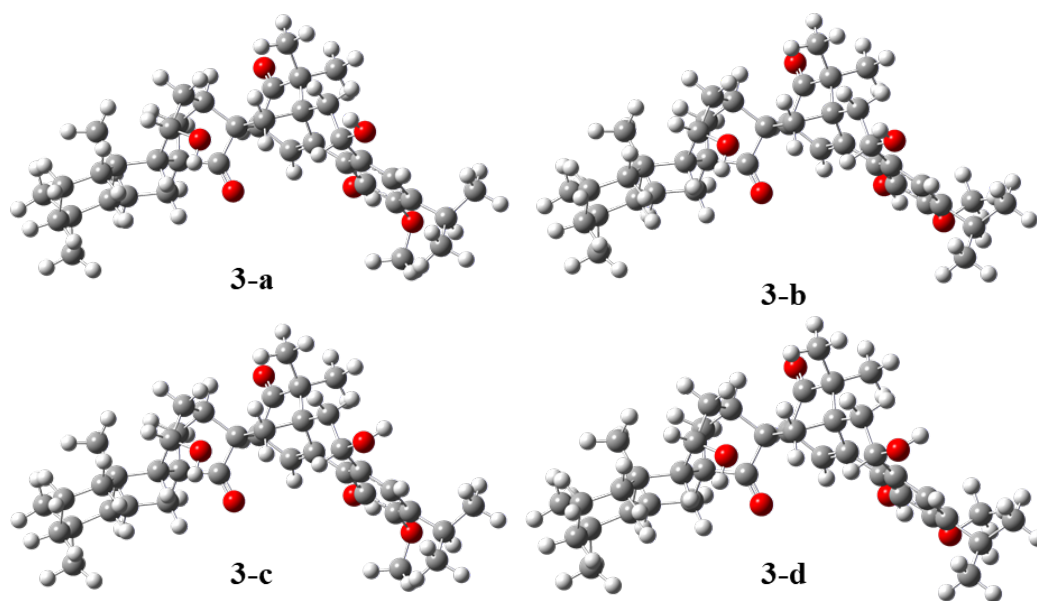

**Figure S7.** The optimized low-energy reoptimized MMFF conformers of **3** at B3LYP/6-31g level in gas.

**Table S7.** Boltzmann populations and relative binding free-energies ( $\Delta G$ ) of conformations of **3**.

| Species              | Boltzmann Population (%) | $\Delta G^\ddagger$ (kJ/mol) |
|----------------------|--------------------------|------------------------------|
| conformer <b>3-a</b> | 0.0828                   | 1.19                         |
| conformer <b>3-b</b> | 0.0305                   | 1.79                         |
| conformer <b>3-c</b> | 0.6212                   | 0                            |
| conformer <b>3-d</b> | 0.2655                   | 0.50                         |

<sup>†</sup> Relative binding free energy

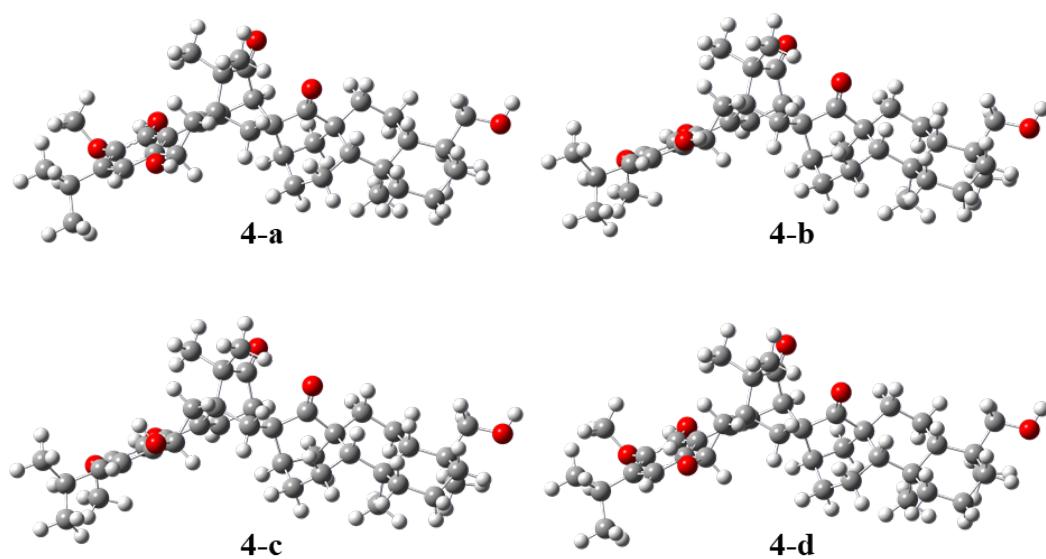

**Figure S8.** The optimized low-energy reoptimized MMFF conformers of **4** at B3LYP/6-31g level in gas

**Table S8.** Boltzmann populations and relative binding free-energies ( $\Delta G$ ) of conformations of **4**.

| Species              | Boltzmann Population (%) | $\Delta G^\ddagger$ (kJ/mol) |
|----------------------|--------------------------|------------------------------|
| conformer <b>4-a</b> | 0.0293                   | 1.74                         |
| conformer <b>4-b</b> | 0.0618                   | 1.30                         |
| conformer <b>4-c</b> | 0.5527                   | 0                            |
| conformer <b>4-d</b> | 0.3562                   | 0.26                         |

<sup>†</sup> Relative binding free energy

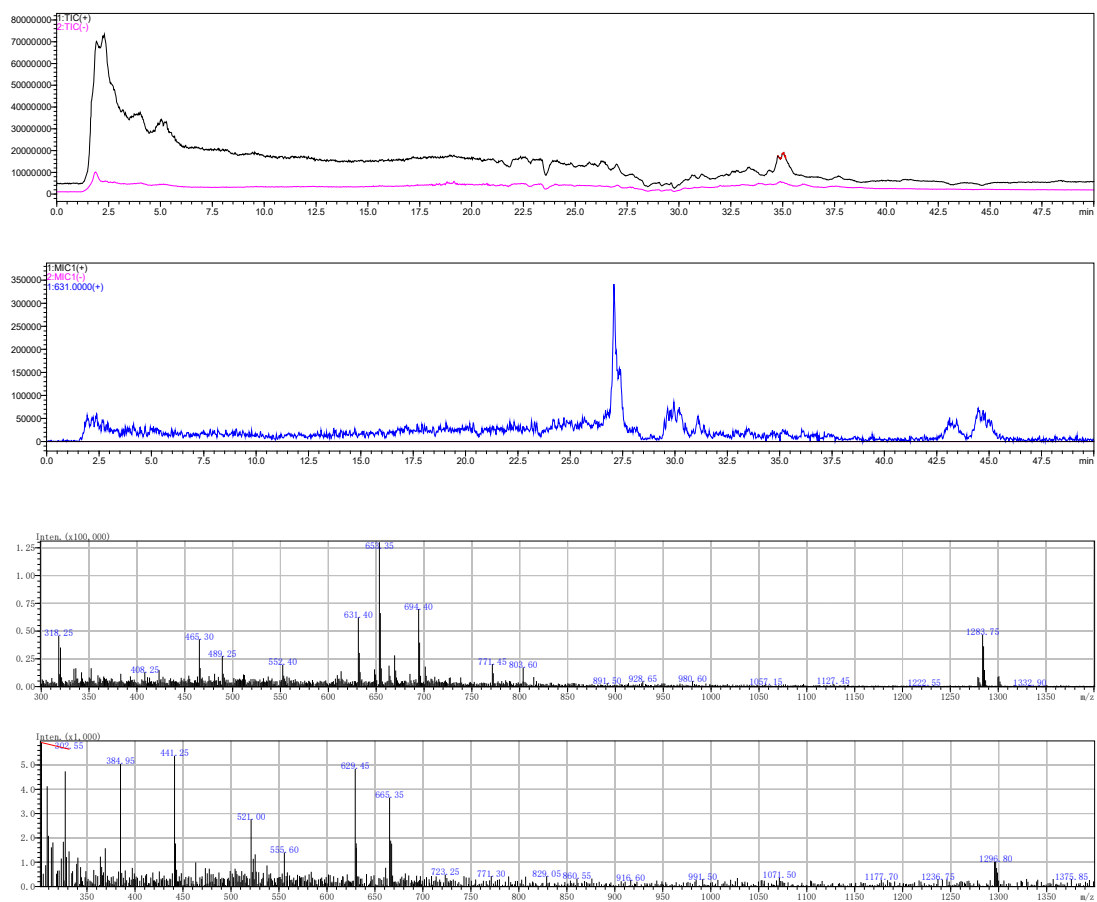

**Figure S9.** TIC and MIC ( $m/z$  [M+H]<sup>+</sup> 631) of the 90% MeOH/H<sub>2</sub>O extract (top) and key MS spectra ( $t_R = 27.1$  min) of  $m/z$  631 ([M+H]<sup>+</sup>) and  $m/z$  629 ([M-H]<sup>-</sup>) (bottom).

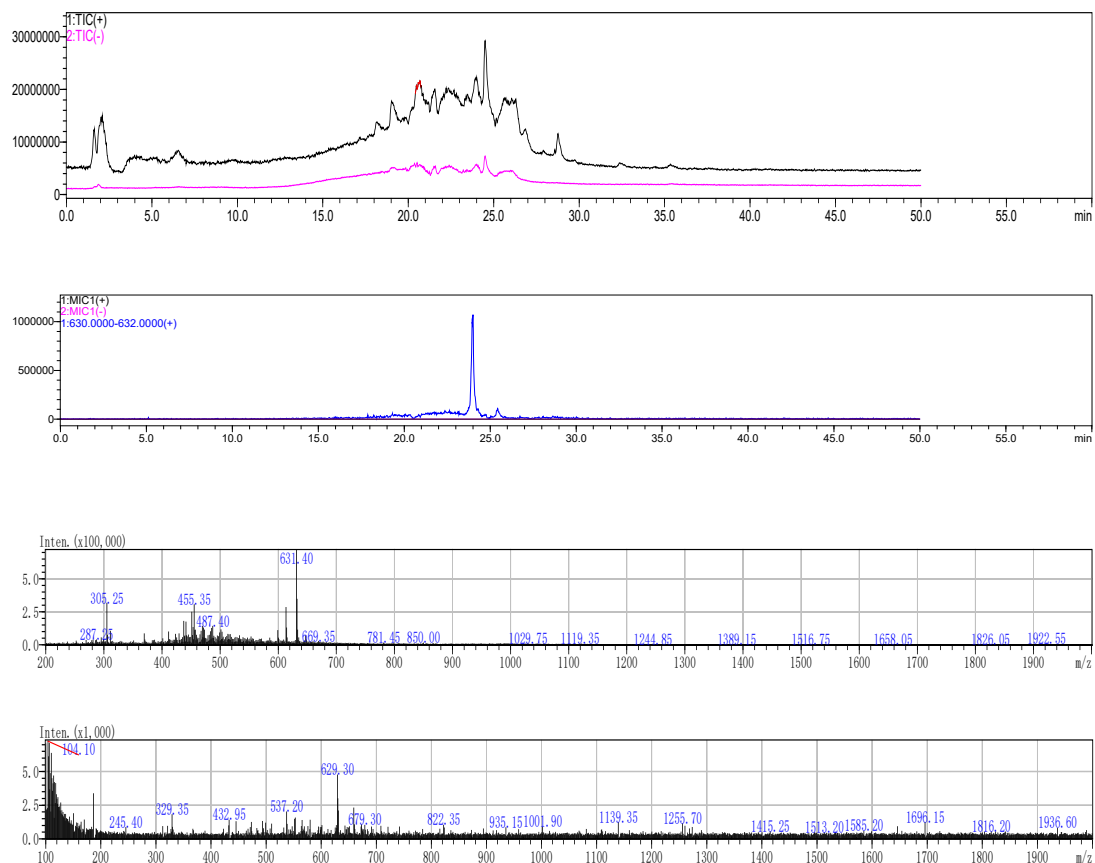

**Figure S10.** TIC and MIC ( $m/z$   $[M+H]^+$  631) of the EtOAc extract (top) and key MS spectra ( $t_R = 24.1$  min) of  $m/z$  631 ( $[M+H]^+$ ) and  $m/z$  629 ( $[M-H]^-$ ) (bottom).



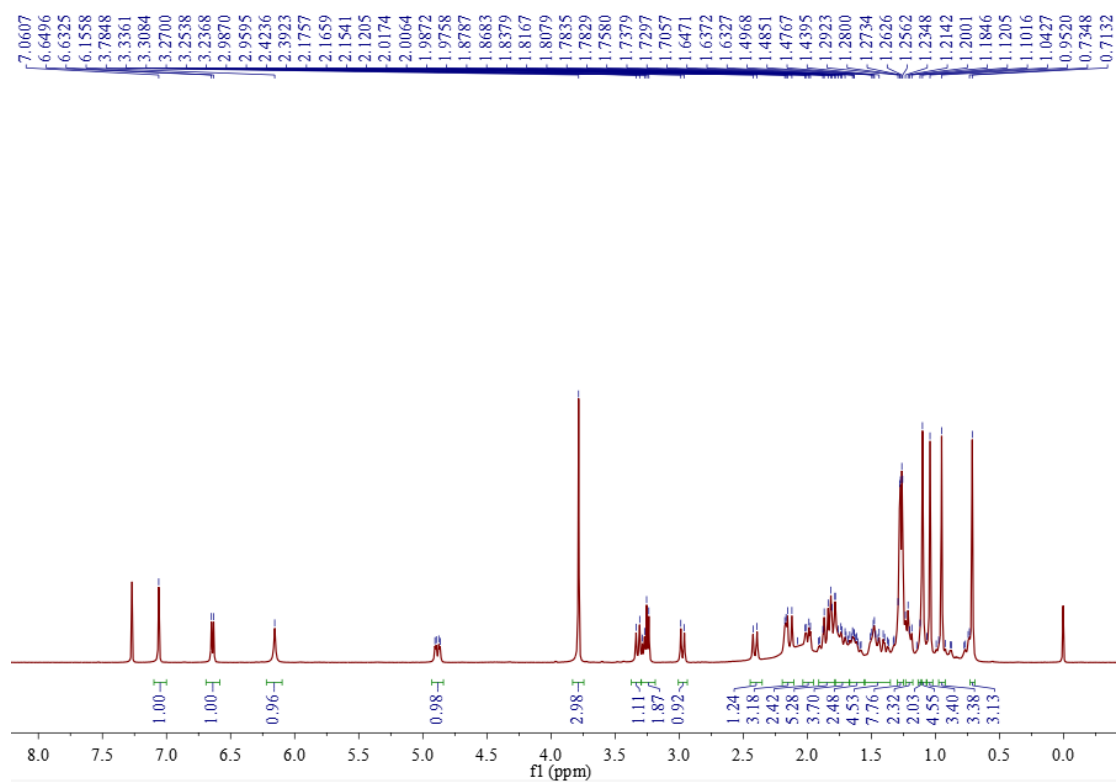

Figure S11.  $^1\text{H}$  NMR spectrum of **1** in  $\text{CDCl}_3$  (400 MHz)

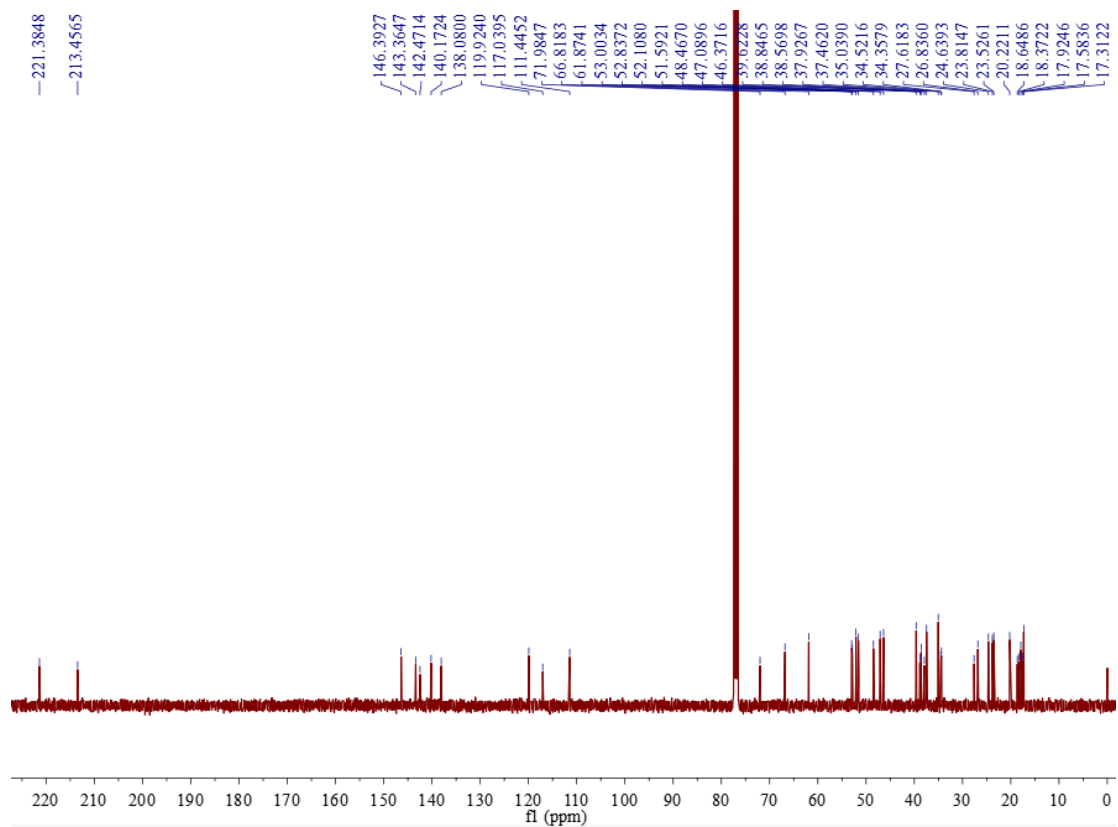

Figure S12.  $^{13}\text{C}$  NMR spectrum of **1** in  $\text{CDCl}_3$  (100 MHz)

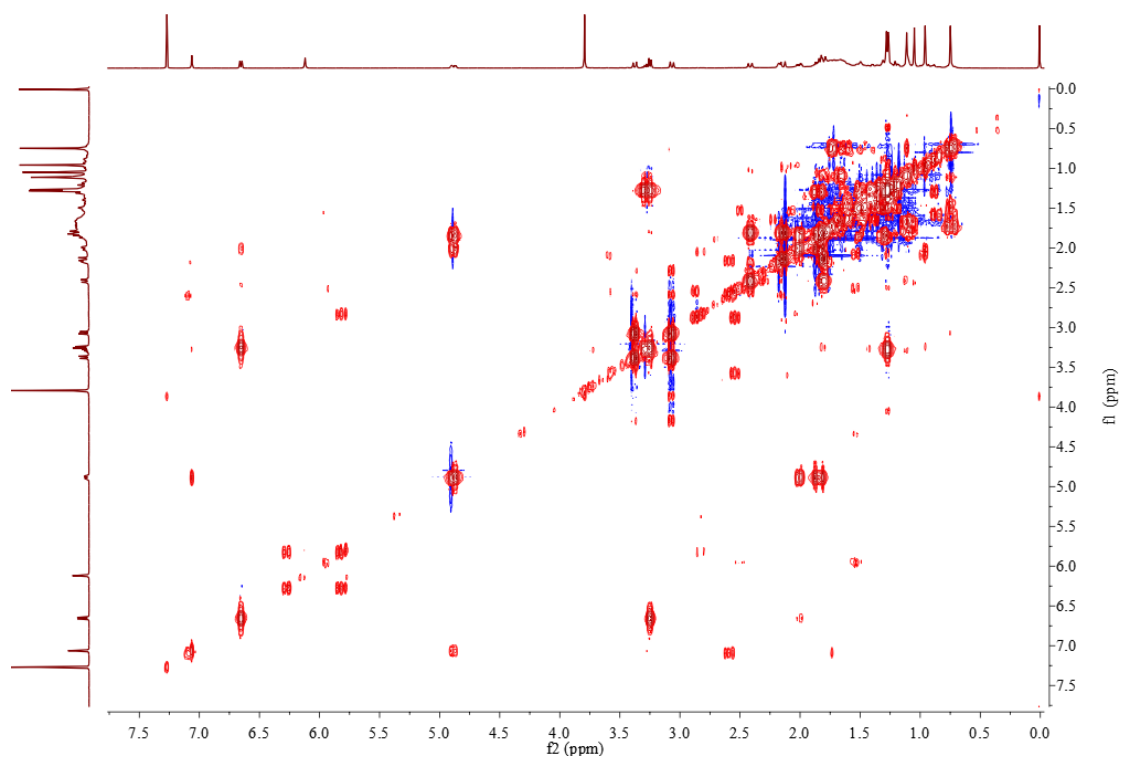

**Figure S13.**  $^1\text{H}$ - $^1\text{H}$  COSY spectrum of **1** in  $\text{CDCl}_3$  (400 MHz)

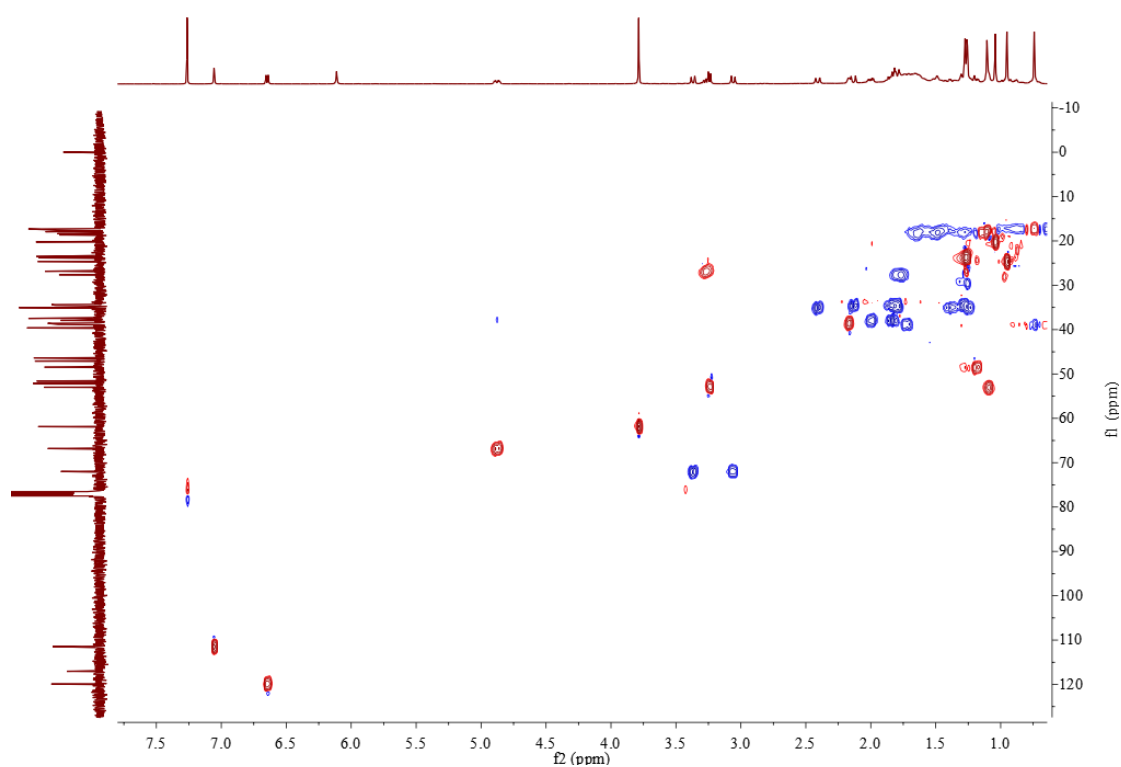

**Figure S14.** HSQC spectrum of **1** in  $\text{CDCl}_3$  (400 MHz)

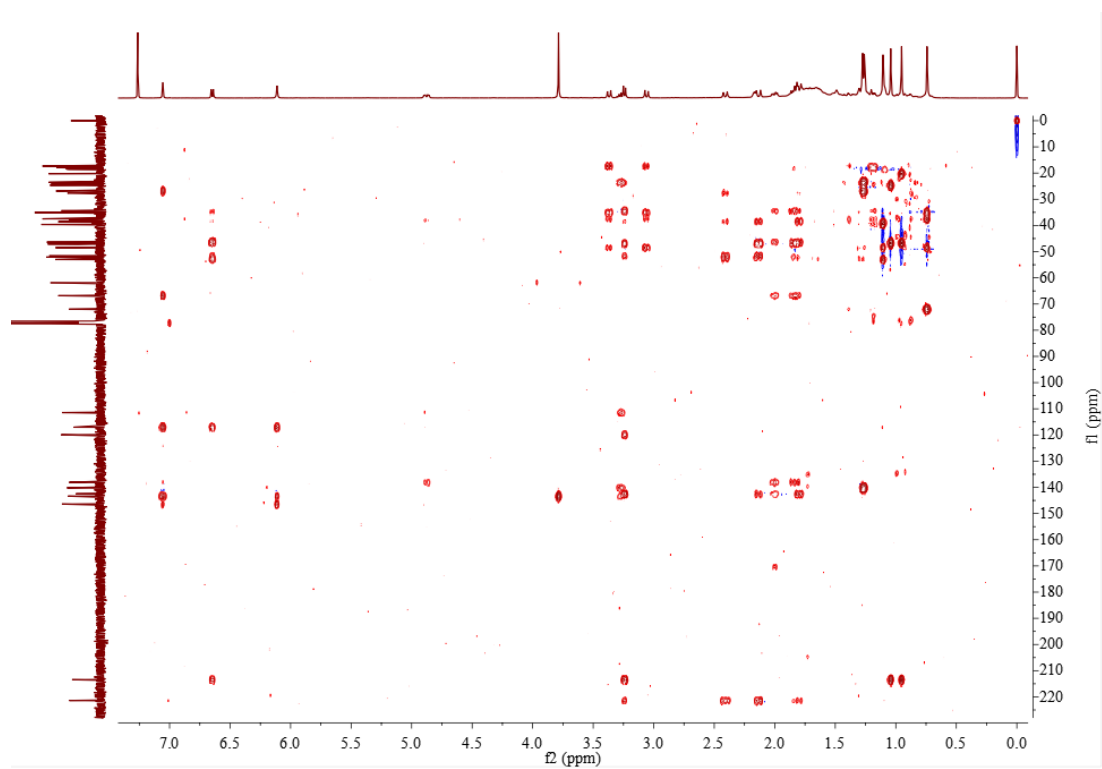

**Figure S15.** HMBC spectrum of **1** in  $\text{CDCl}_3$  (400 MHz)

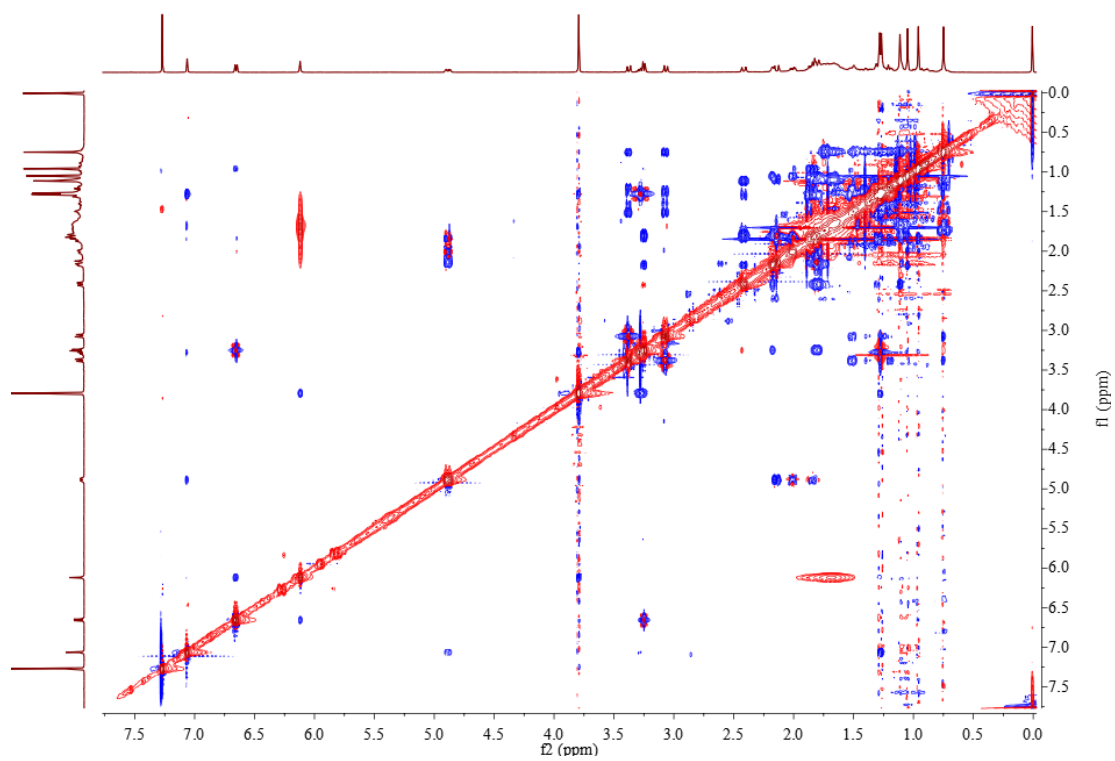

**Figure S16.** NOESY spectrum of **1** in  $\text{CDCl}_3$  (400 MHz)

630.39204 (Mass/RT/Isotope/Library/Formula) ✓✓✓

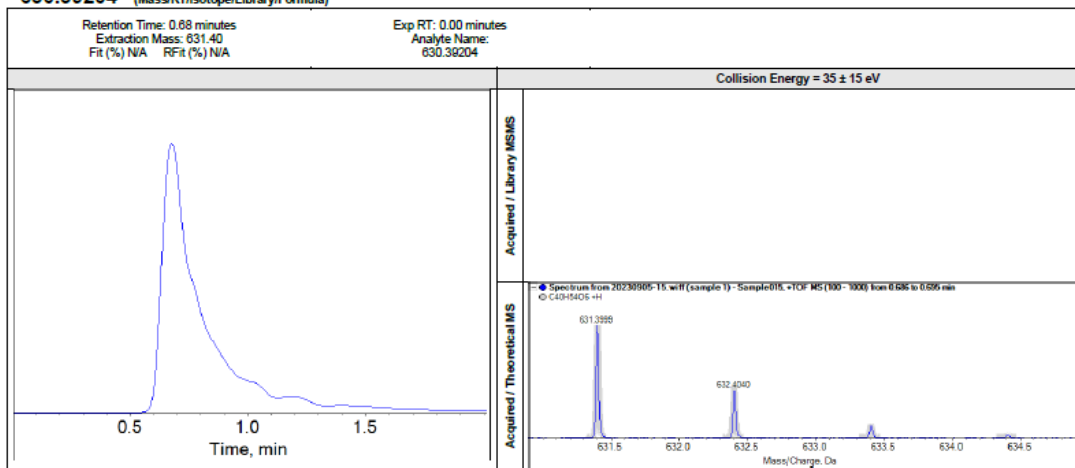

| Compound Name (Library Hit) | Score | Formula  | Intensity | Threshold | Expected m/z | Found at m/z | Error (ppm) | Expected RT (min) | Found RT (min) | RT Delta (min) | Isotope Diff (%) | Library Score (%) |
|-----------------------------|-------|----------|-----------|-----------|--------------|--------------|-------------|-------------------|----------------|----------------|------------------|-------------------|
| 630.39204 (YNS-27)          | 96%   | C40H54O6 | 1038717   | 5         | 631.3993     | 631.3999     | 0.9         | 0.00              | 0.68           | 0.68           | 3.5%             | NA                |

Figure S17. HRESIMS report of 1

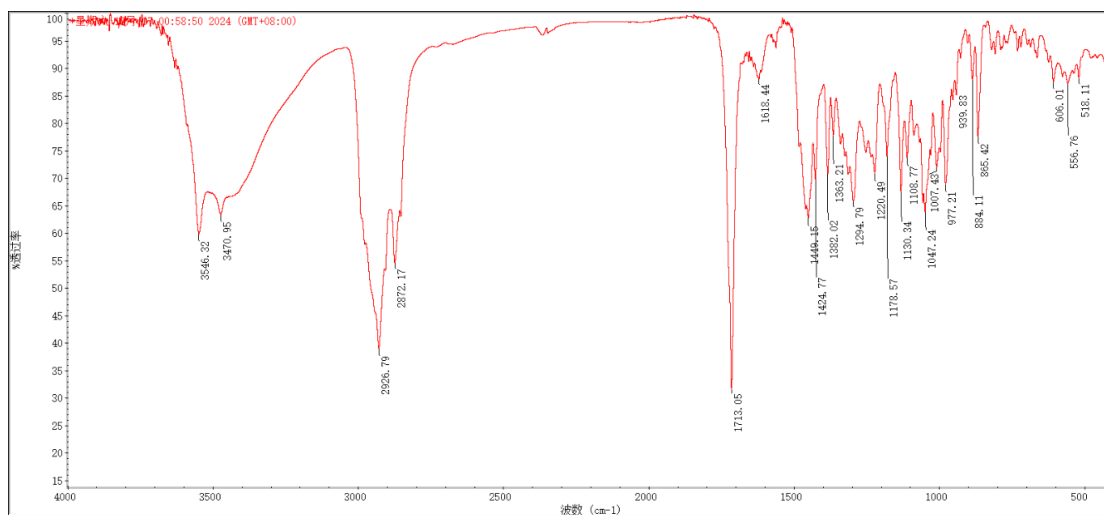

Figure S18. IR spectrum of 1

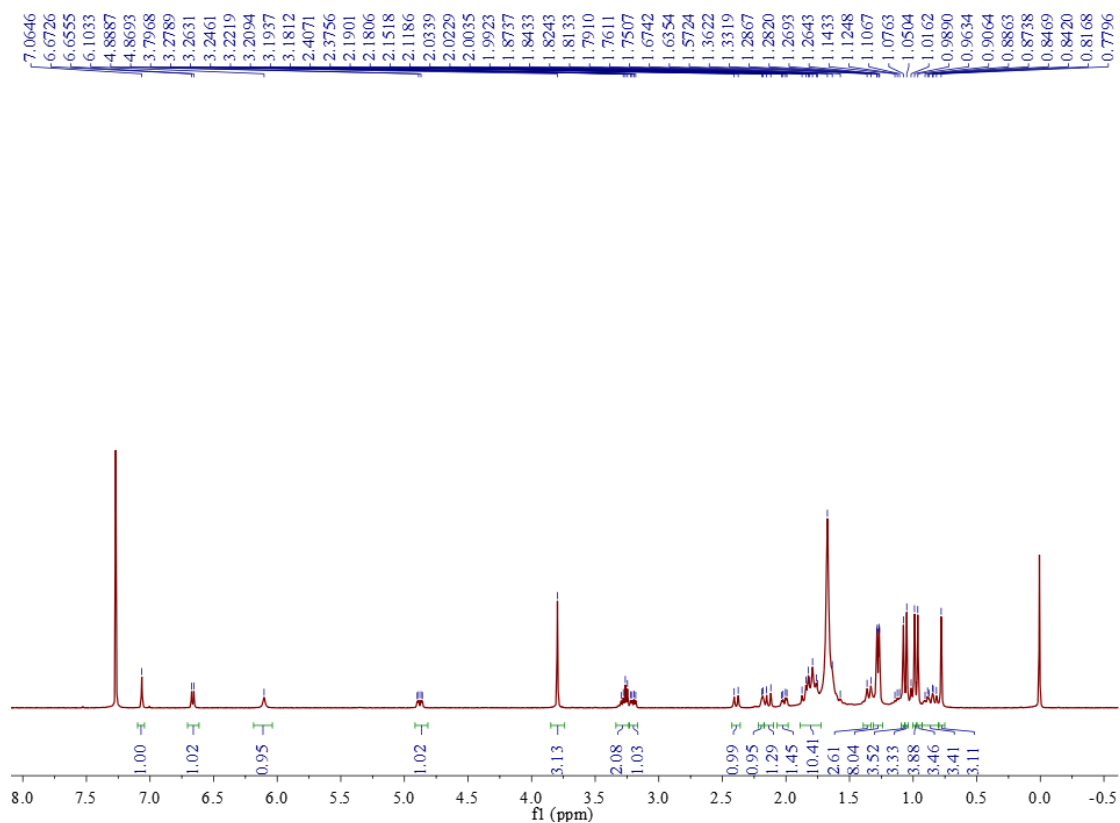

Figure S19.  $^1\text{H}$  NMR spectrum of **2** in  $\text{CDCl}_3$  (400 MHz)

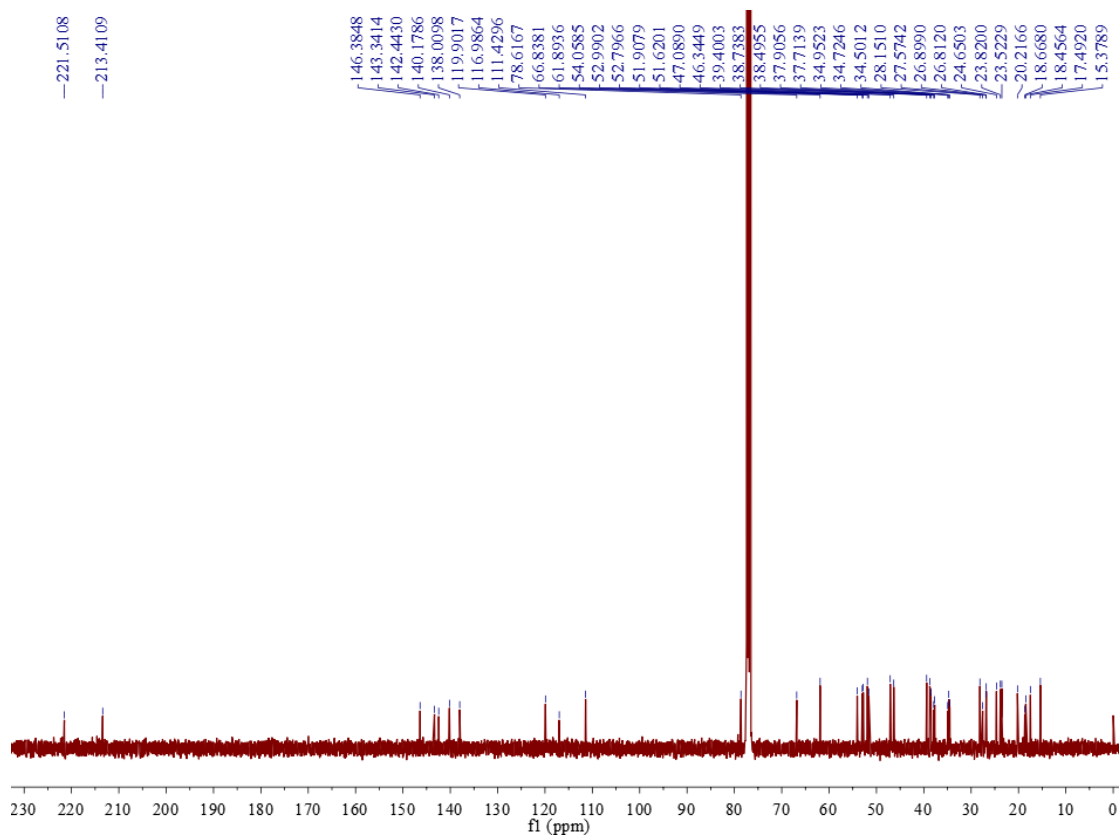

Figure S20.  $^{13}\text{C}$  NMR spectrum of **2** in  $\text{CDCl}_3$  (100 MHz)

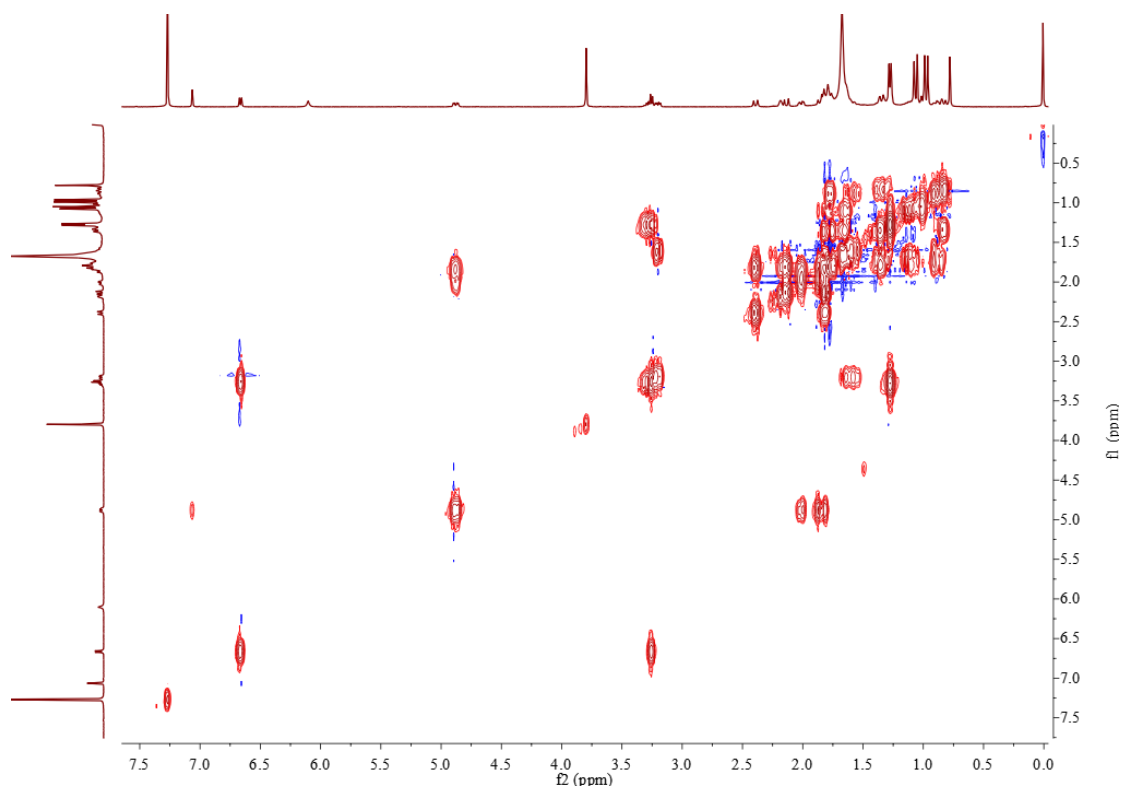

Figure S21.  $^1\text{H}$ - $^1\text{H}$  COSY spectrum of **2** in  $\text{CDCl}_3$  (400 MHz)

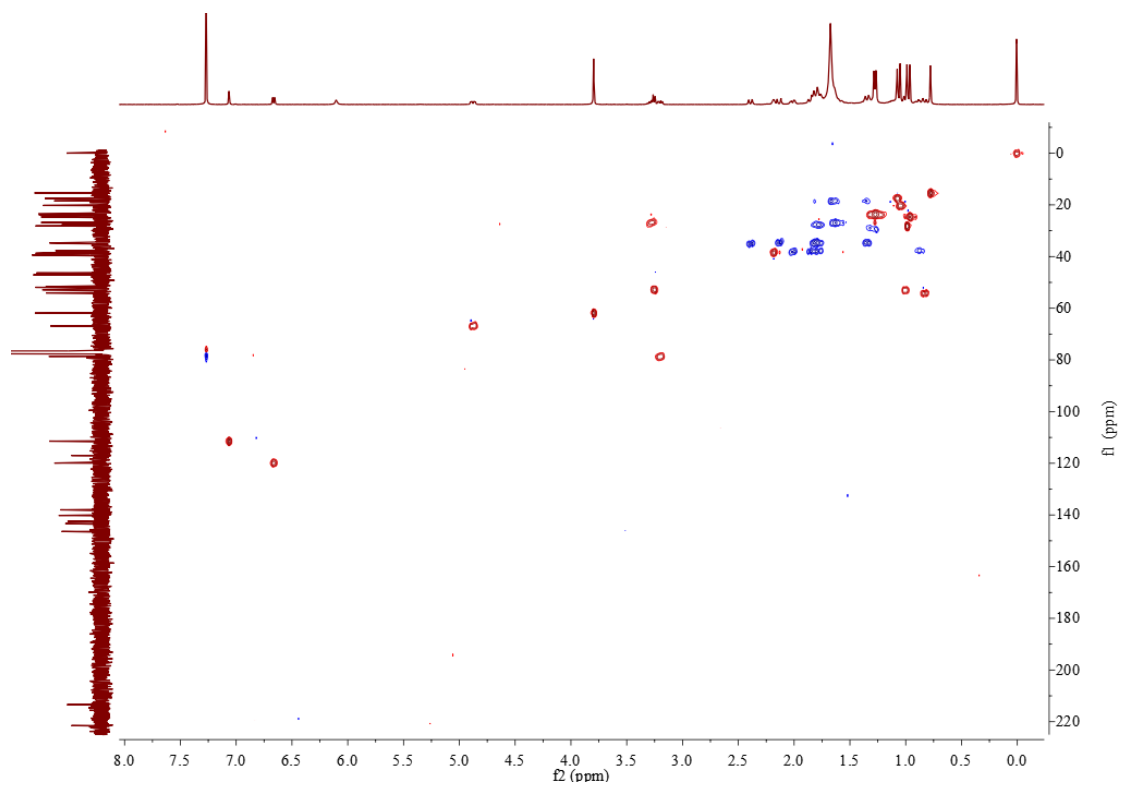

Figure S22. HSQC spectrum of **2** in  $\text{CDCl}_3$  (400 MHz)

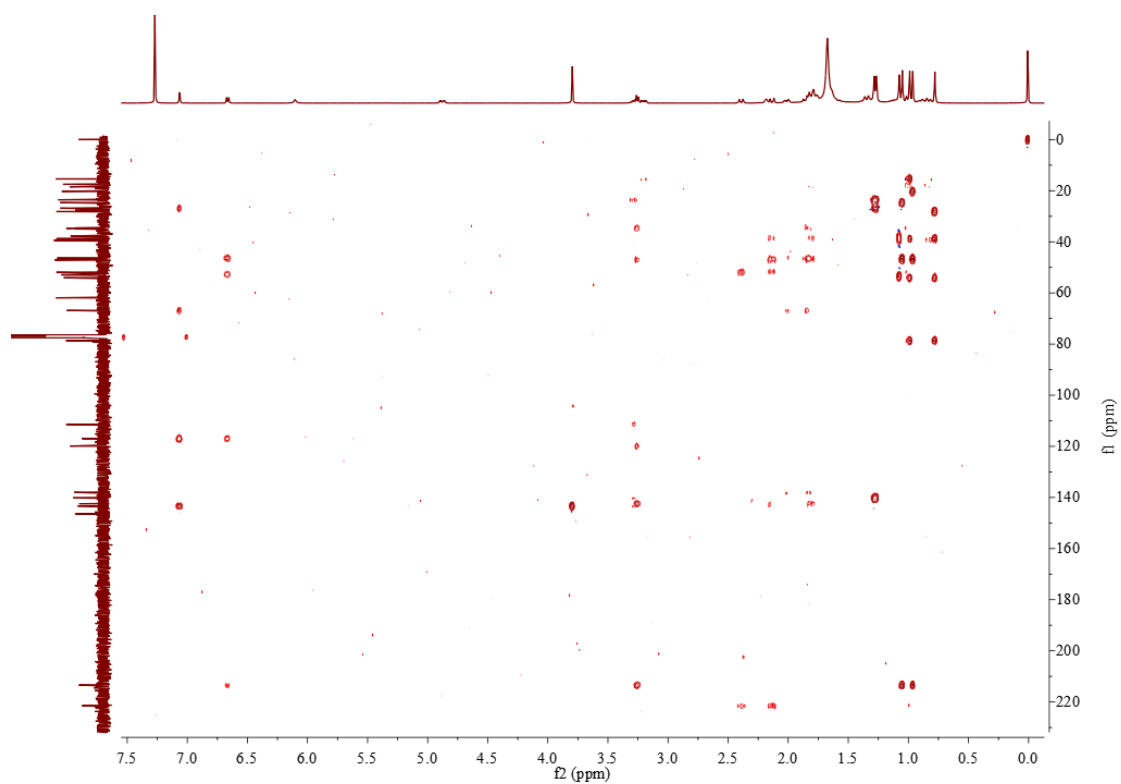

Figure S23. HMBC spectrum of **2** in  $\text{CDCl}_3$  (400 MHz)

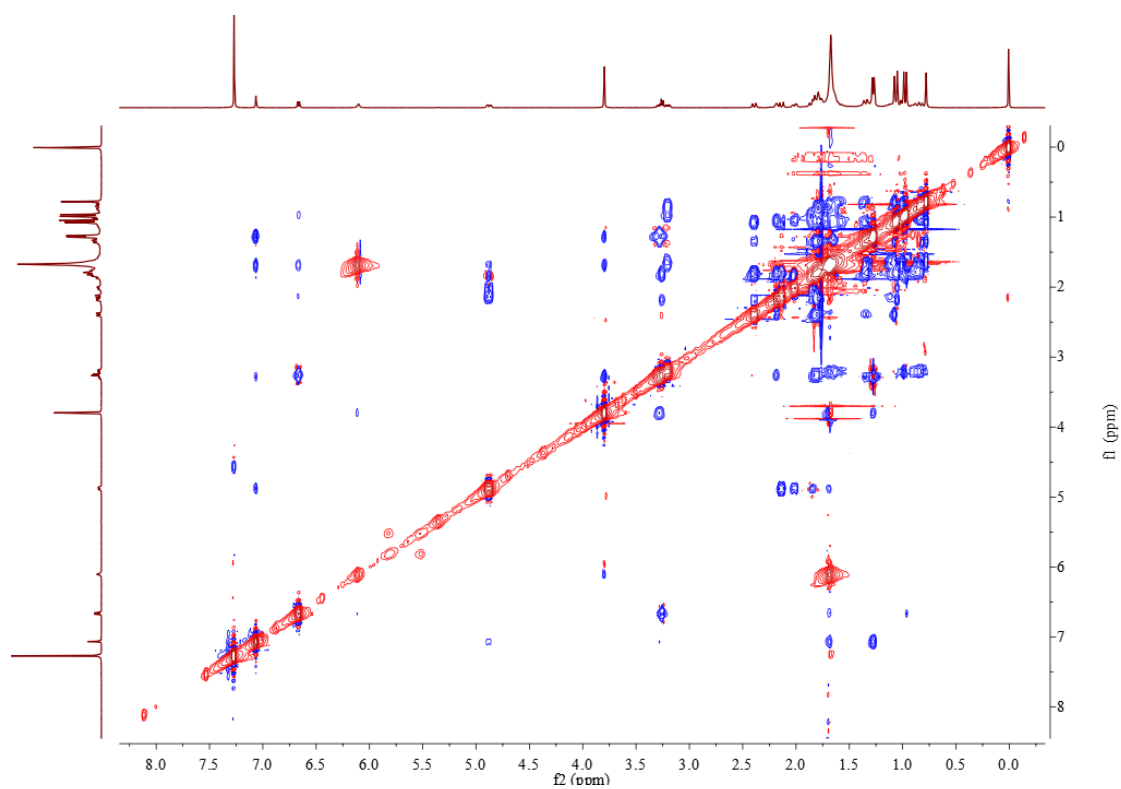

Figure S24. NOESY spectrum of **2** in  $\text{CDCl}_3$  (400 MHz)

630.39204 (Mass/RT/Isotope/Library/Formulas) ✓✓✓

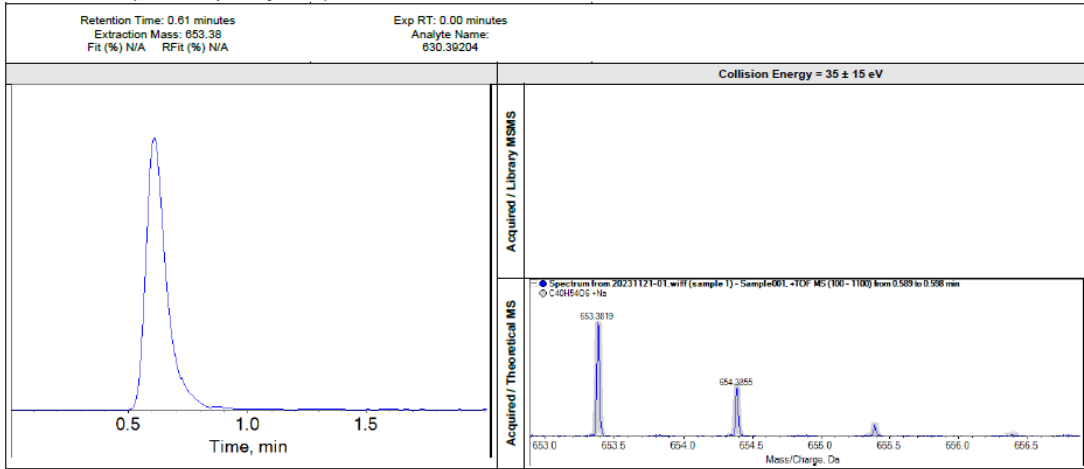

| Compound Name (Library Hit) | Score | Formula                                        | Intensity | Threshold | Expected m/z | Found at m/z | Error (ppm) | Expected RT (min) | Found RT (min) | RT Delta (min) | Isotope Diff (%) | Library Score (%) |
|-----------------------------|-------|------------------------------------------------|-----------|-----------|--------------|--------------|-------------|-------------------|----------------|----------------|------------------|-------------------|
| 630.39204 (YNS-42)          | 95%   | C <sub>40</sub> H <sub>54</sub> O <sub>6</sub> | 31270     | 5         | 653.3813     | 653.3819     | 1.0         | 0.00              | 0.61           | 0.61           | 4.0%             | N/A               |

Figure S25. HRESIMS report of 2

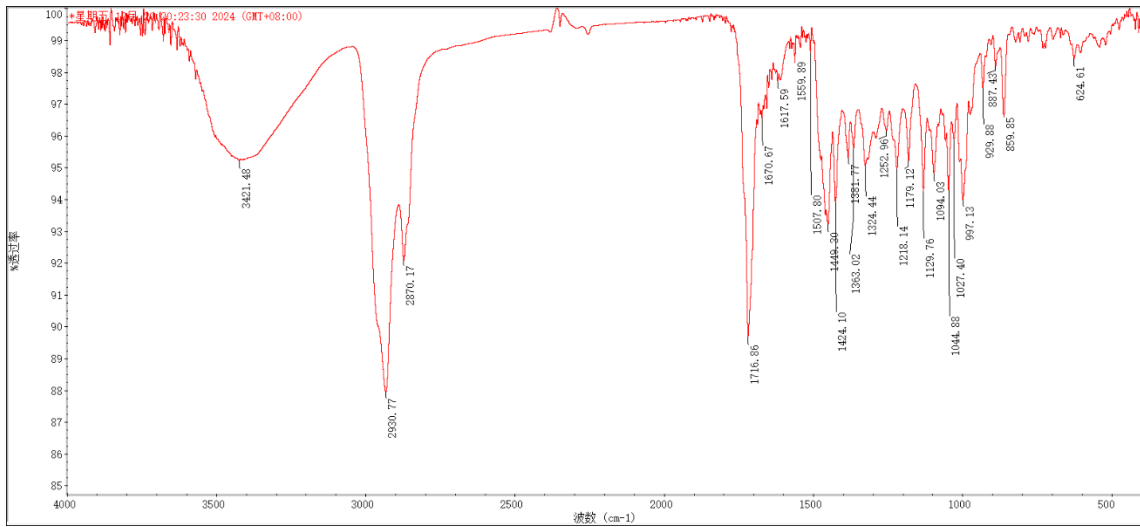

Figure S26. IR spectrum of 2



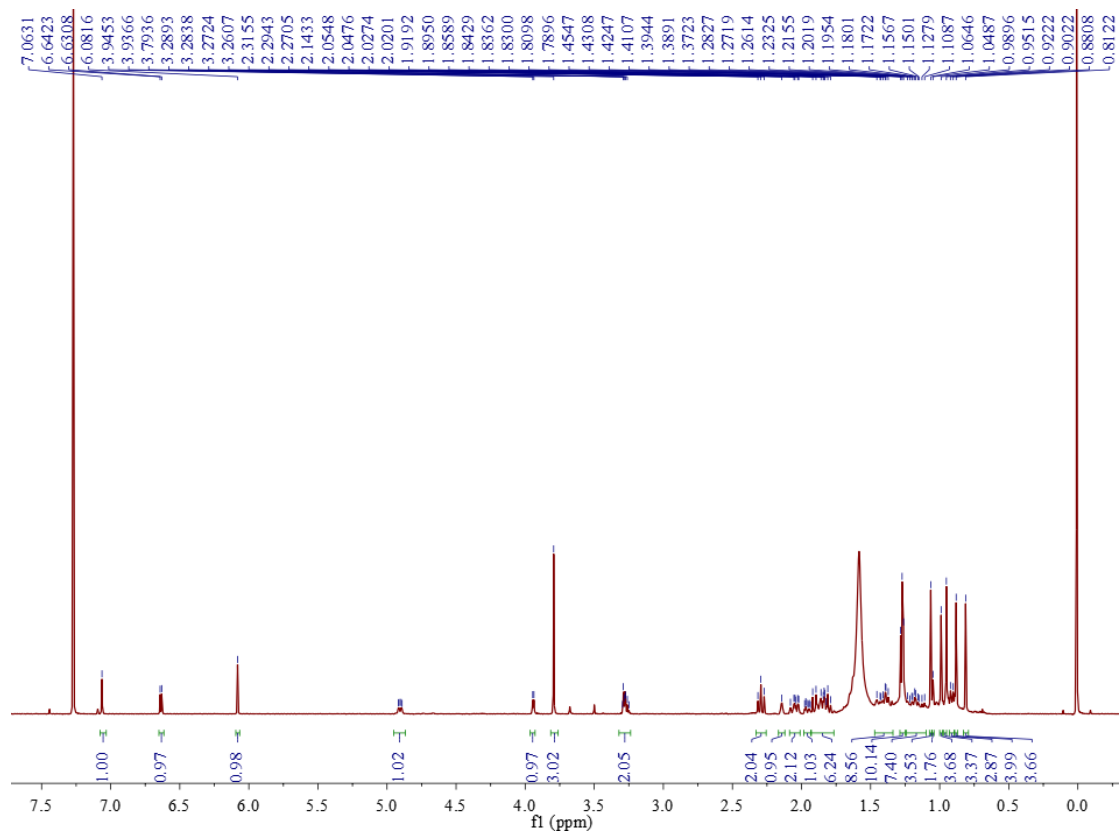

Figure S27.  $^1\text{H}$  NMR spectrum of **3** in  $\text{CDCl}_3$  (600 MHz)

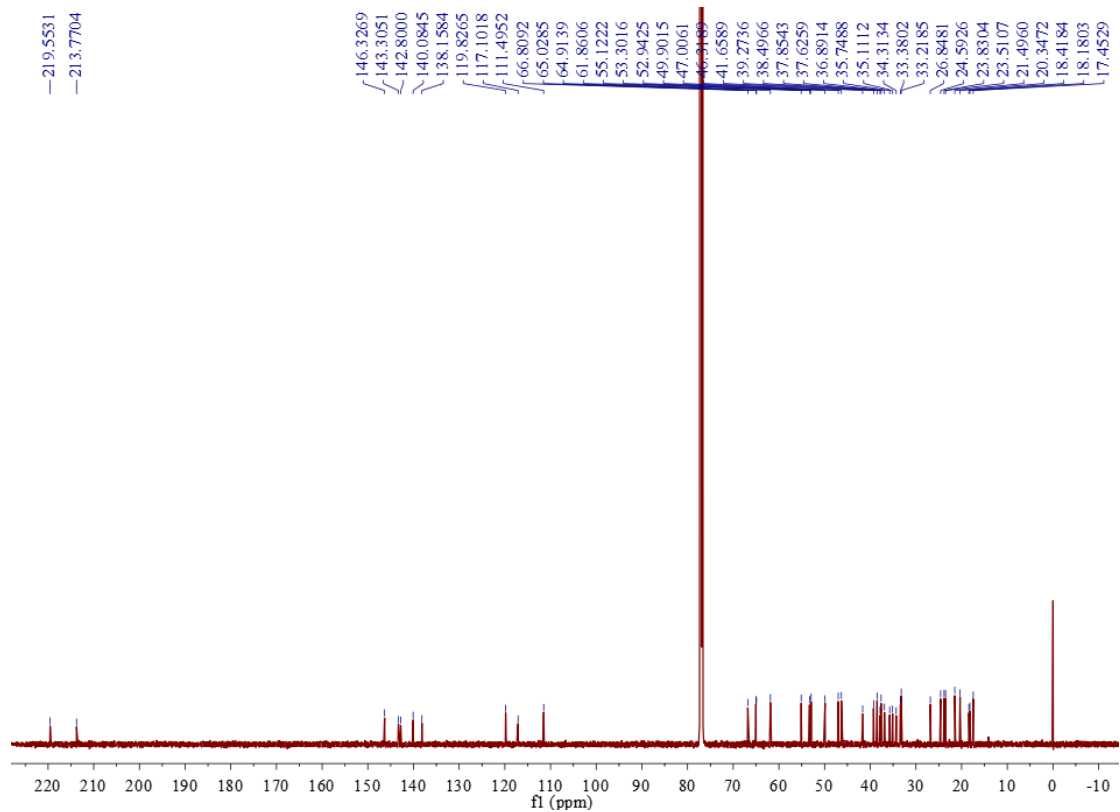

Figure S28.  $^{13}\text{C}$  NMR spectrum of **3** in  $\text{CDCl}_3$  (150 MHz)

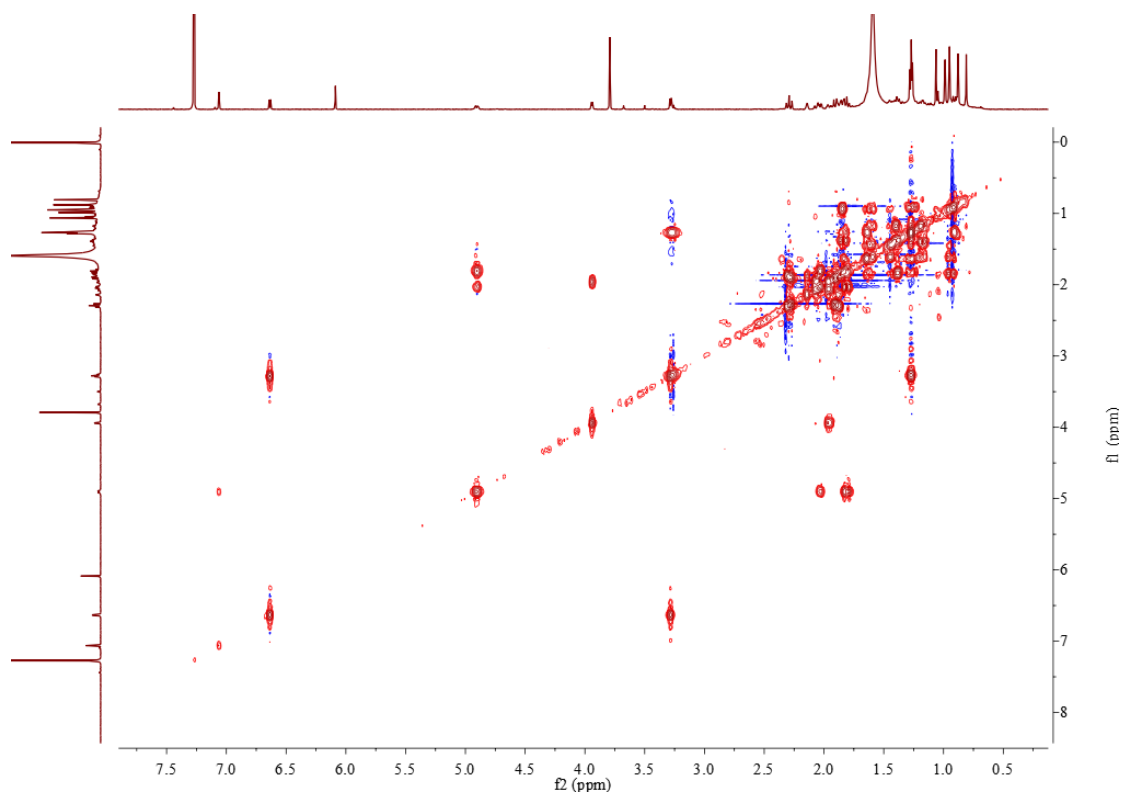

Figure S29.  $^1\text{H}$ - $^1\text{H}$  COSY spectrum of **3** in  $\text{CDCl}_3$  (600 MHz)

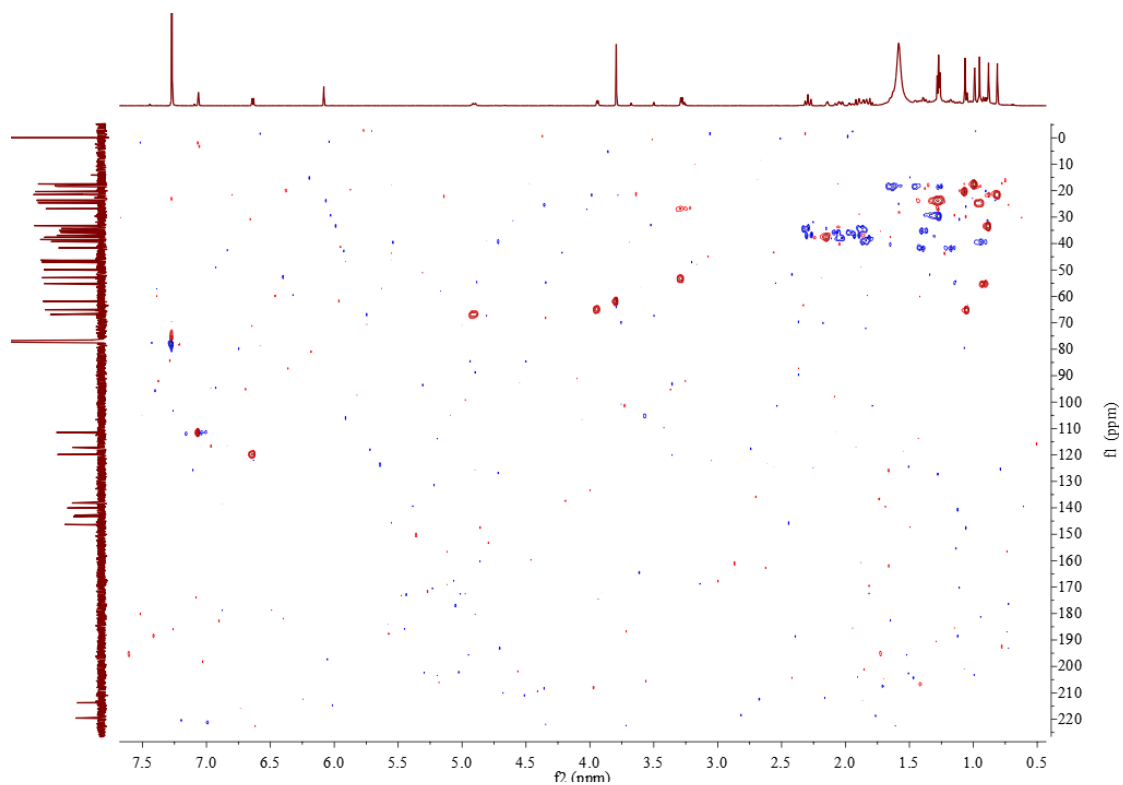

Figure S30. HSQC spectrum of **3** in  $\text{CDCl}_3$  (400 MHz)

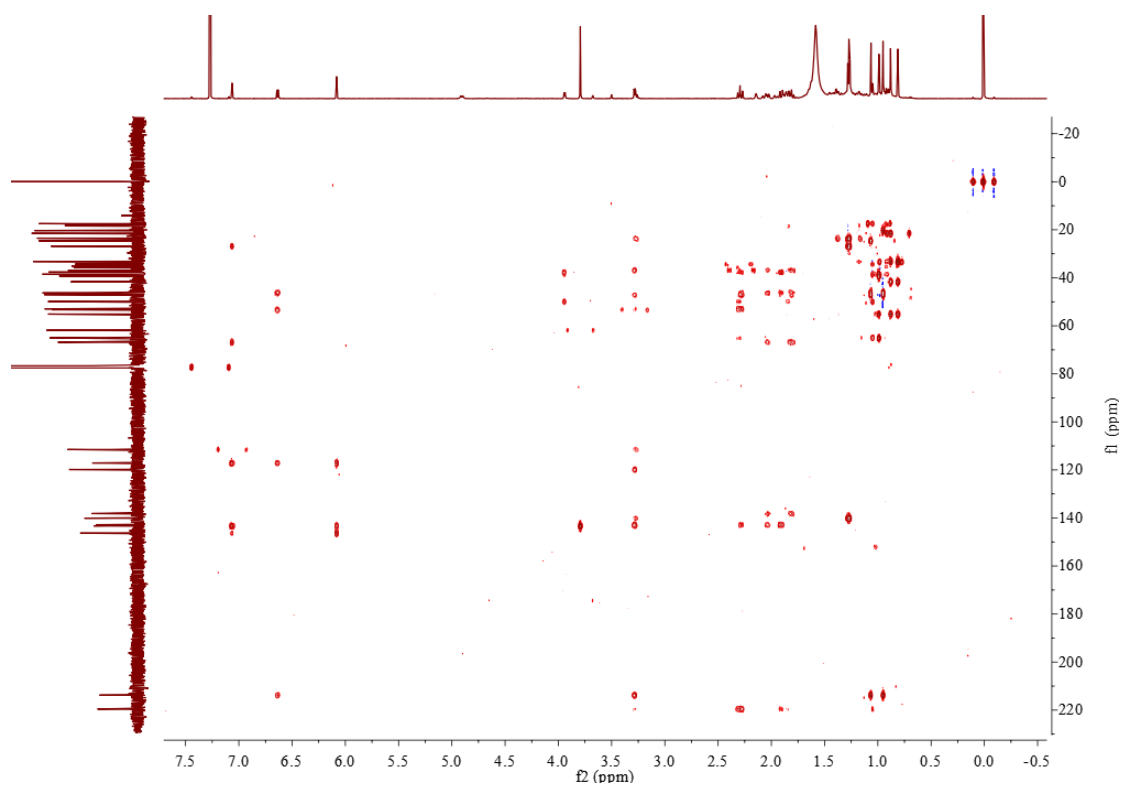

**Figure S31.** HMBC spectrum of **3** in CDCl<sub>3</sub> (600 MHz)

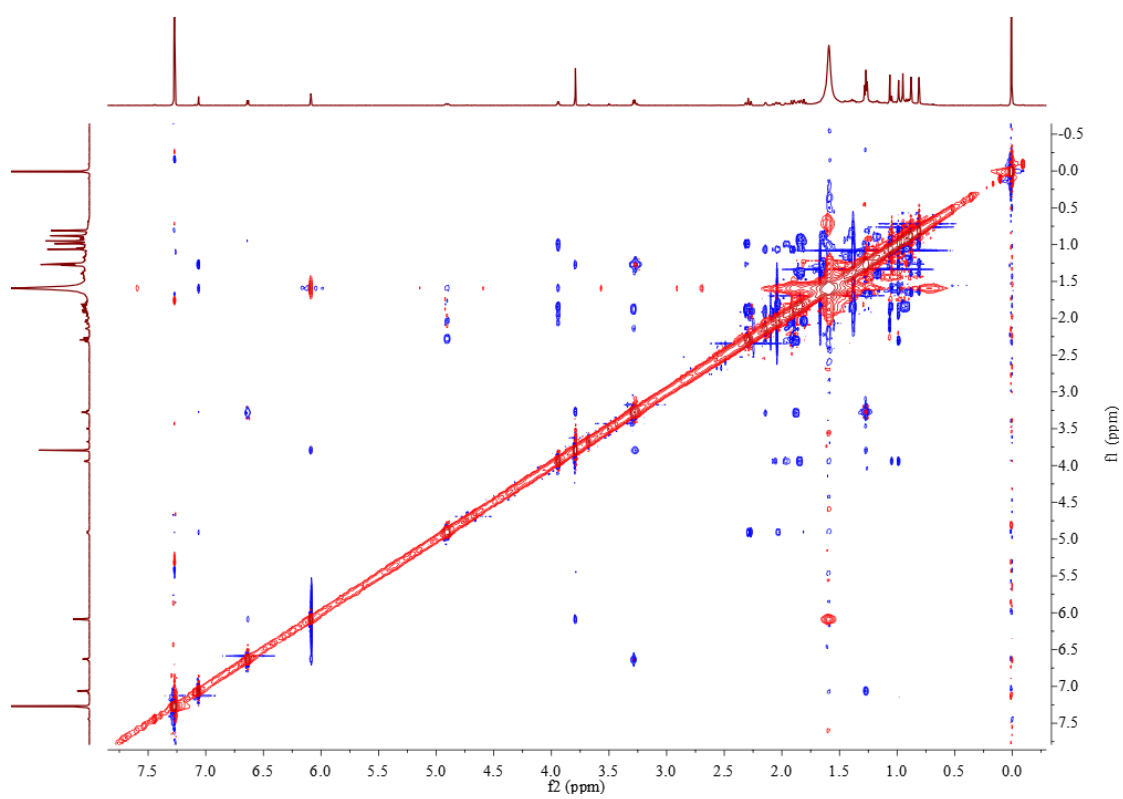

**Figure S32.** NOESY spectrum of **3** in CDCl<sub>3</sub> (600 MHz)

630.39204 (Mass/RT/Isotope/Library/Formu) ✓✓✓✓

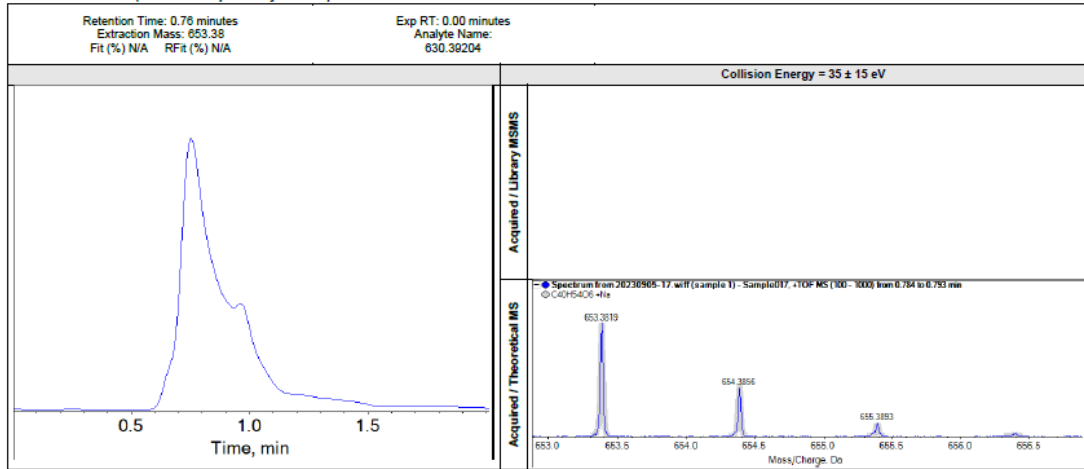

| Compound Name (Library Hit) | Score | Formula  | Intensity | Threshold | Expected m/z | Found at m/z | Error (ppm) | Expected RT (min) | Found RT (min) | RT Delta (min) | Isotope Diff (%) | Library Score (%) |
|-----------------------------|-------|----------|-----------|-----------|--------------|--------------|-------------|-------------------|----------------|----------------|------------------|-------------------|
| 630.39204 (YNS-30)          | 96%   | C40H54O6 | 291742    | 5         | 653.3813     | 653.3819     | 0.9         | 0.00              | 0.76           | 0.76           | 2.8%             | N/A               |

Figure S33. HRESIMS report of 3.

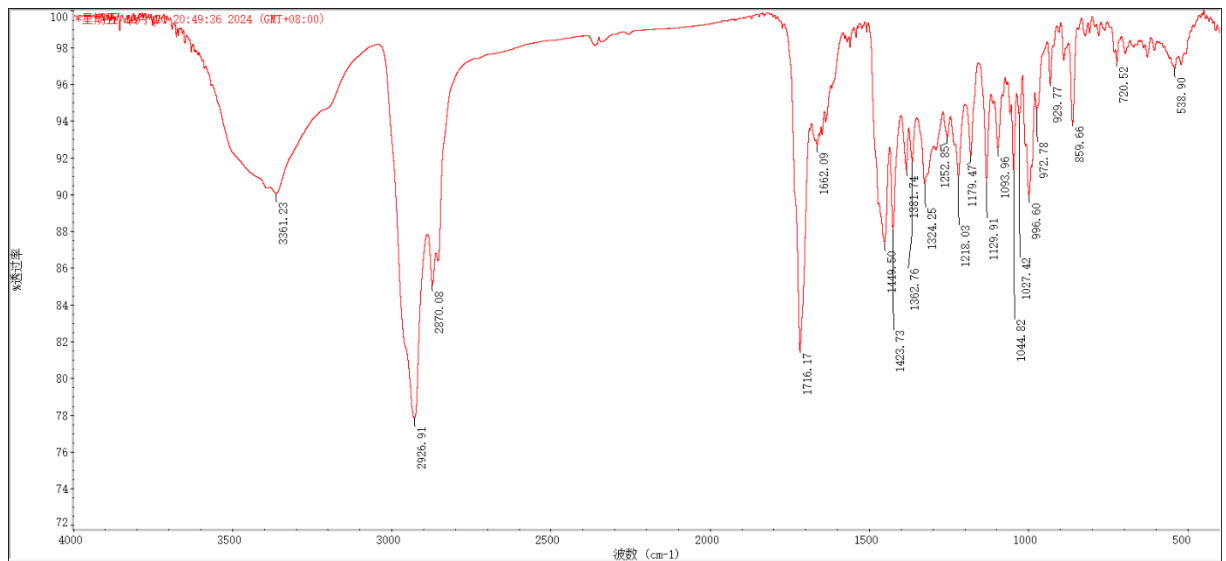

Figure S34. IR spectrum of 3.

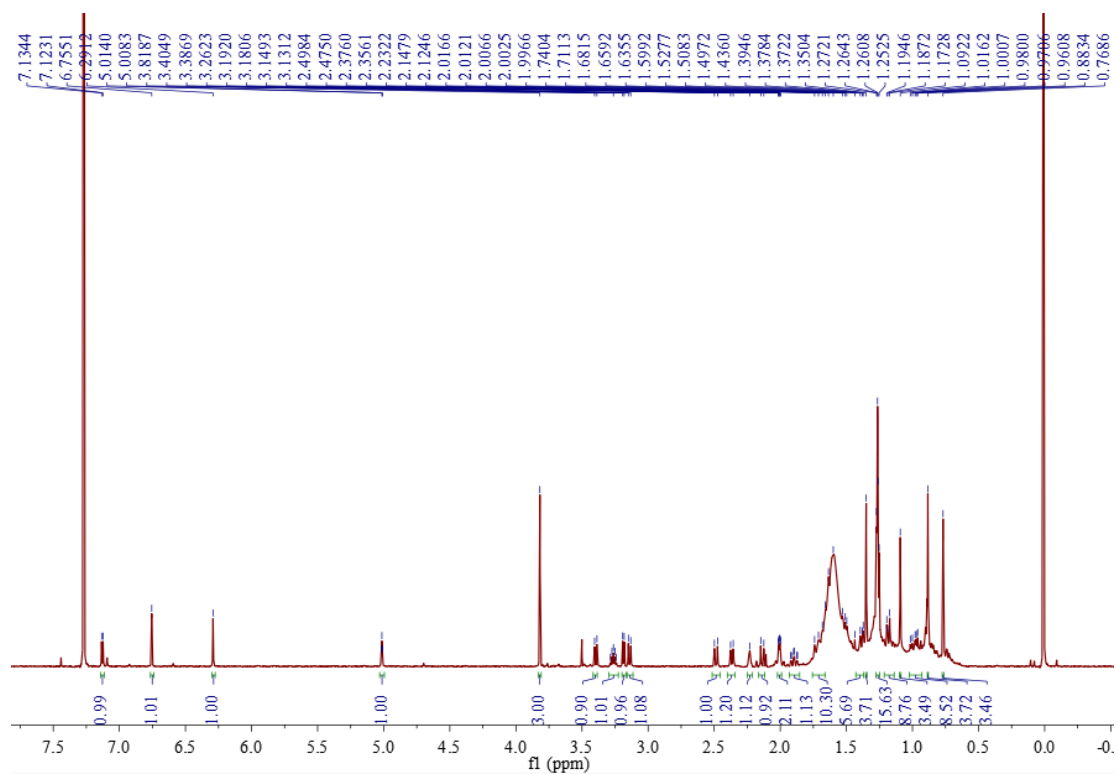

Figure S35.  $^1\text{H}$  NMR spectrum of **4** in  $\text{CDCl}_3$  (600 MHz)

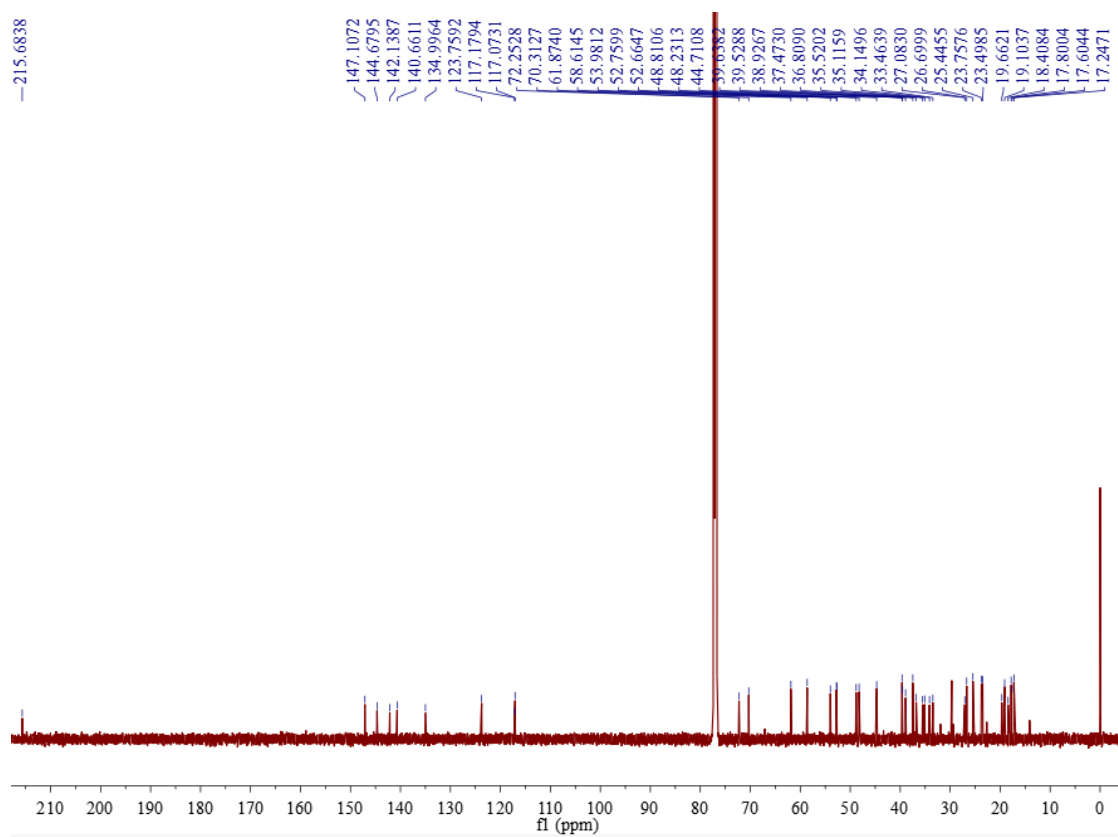

Figure S36.  $^{13}\text{C}$  NMR spectrum of **4** in  $\text{CDCl}_3$  (150 MHz)

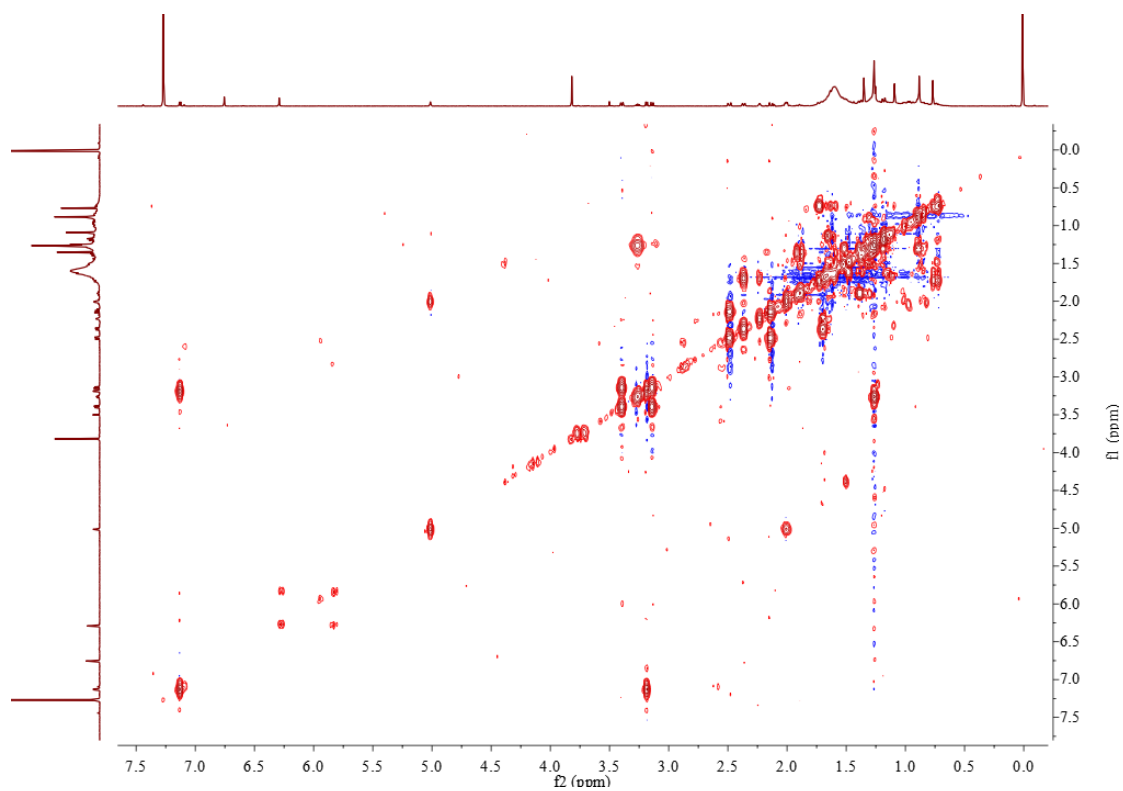

**Figure S37.**  $^1\text{H}$ - $^1\text{H}$  COSY spectrum of **4** in  $\text{CDCl}_3$  (600 MHz)

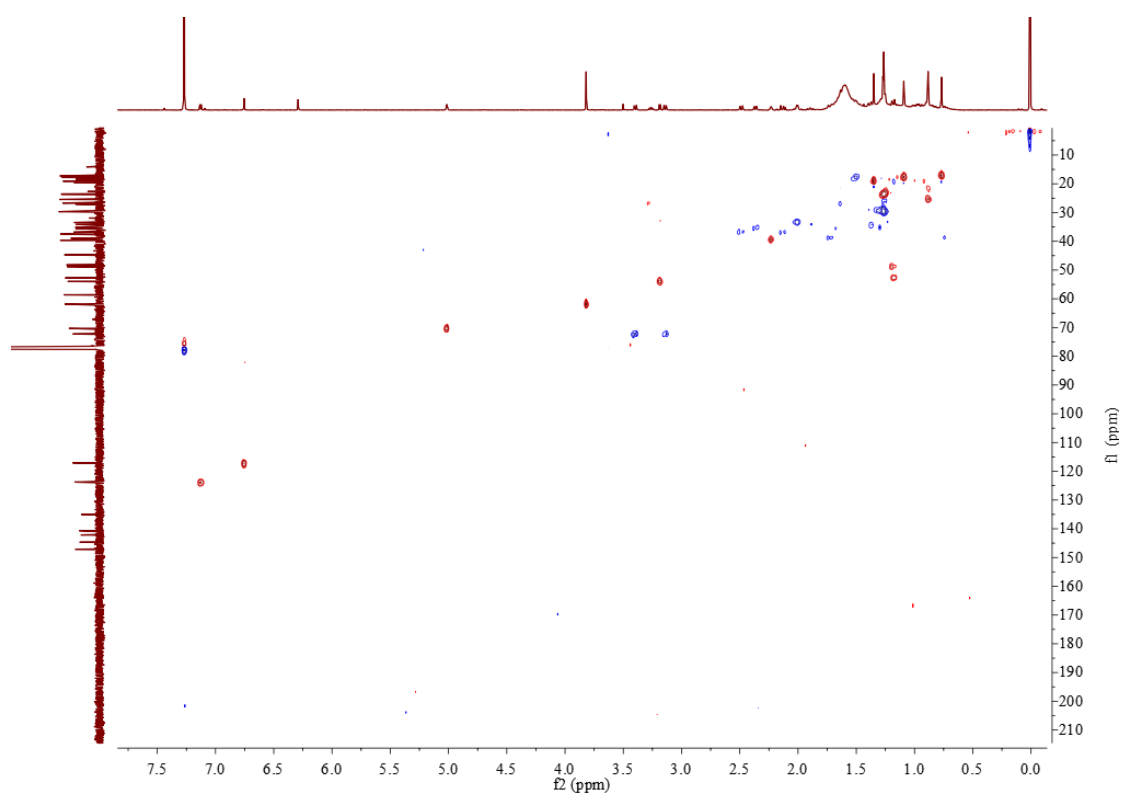

**Figure S38.** HSQC spectrum of **4** in  $\text{CDCl}_3$  (600 MHz)

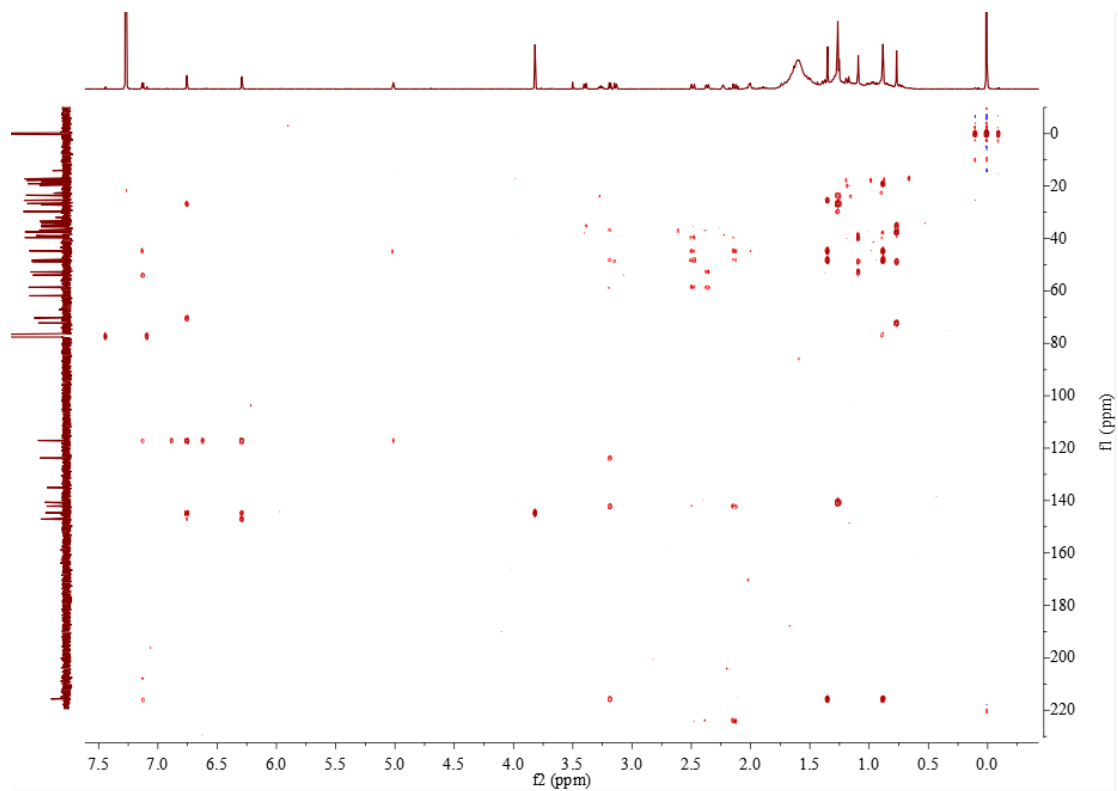

**Figure S39.** HMBC spectrum of **4** in CDCl<sub>3</sub> (600 MHz)

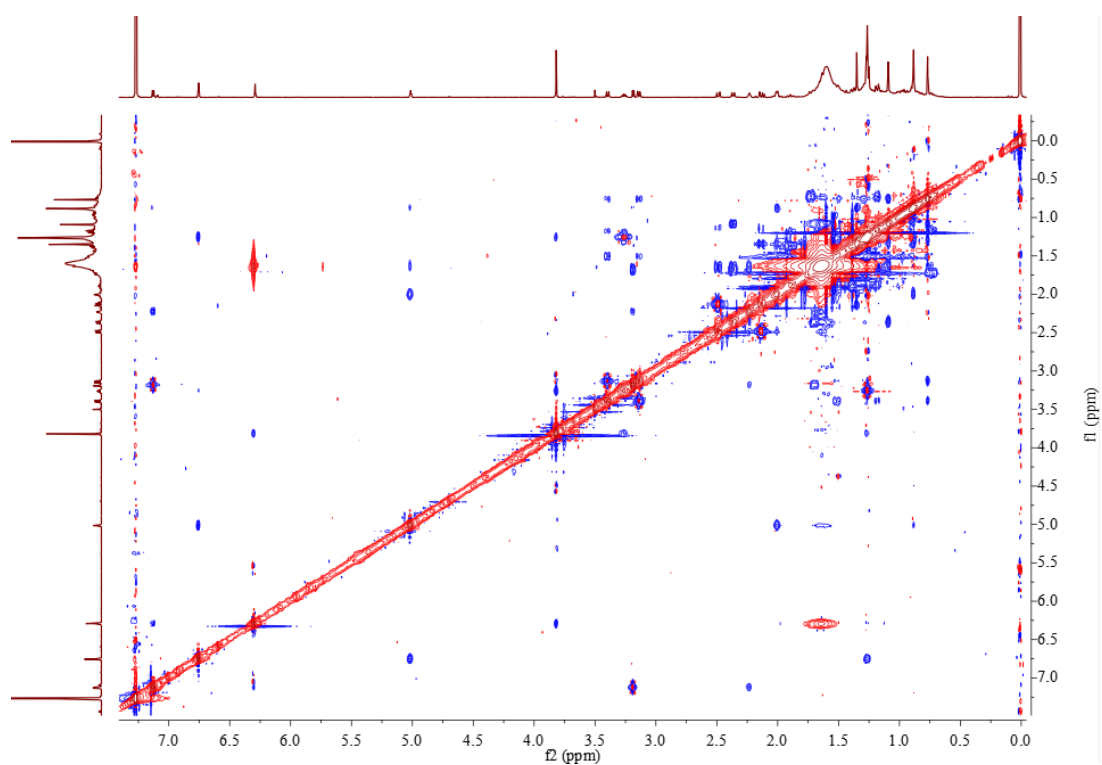

**Figure S40.** NOESY spectrum of **4** in CDCl<sub>3</sub> (400 MHz)

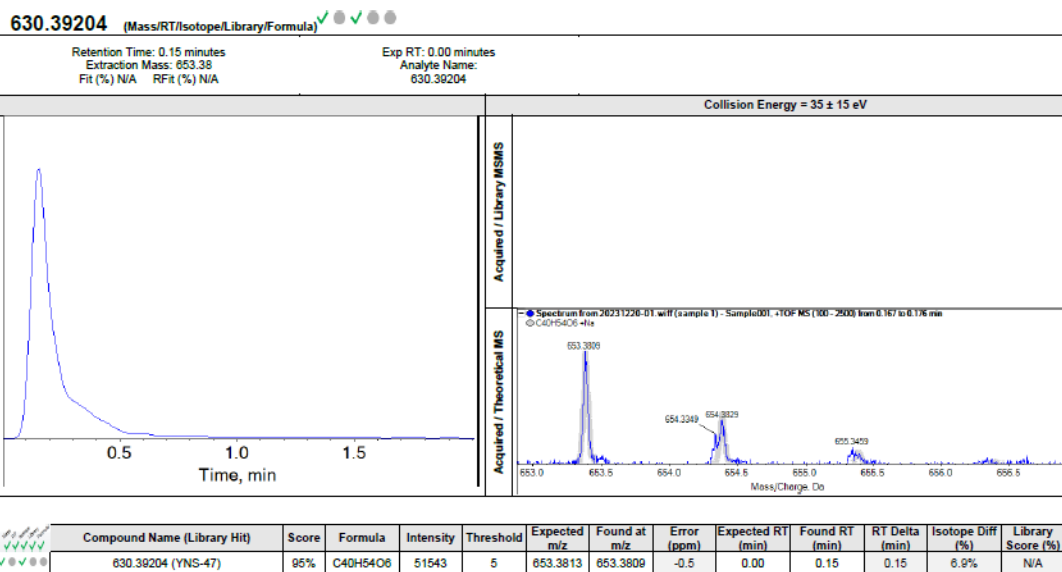

Figure S41. HRESIMS report of 4

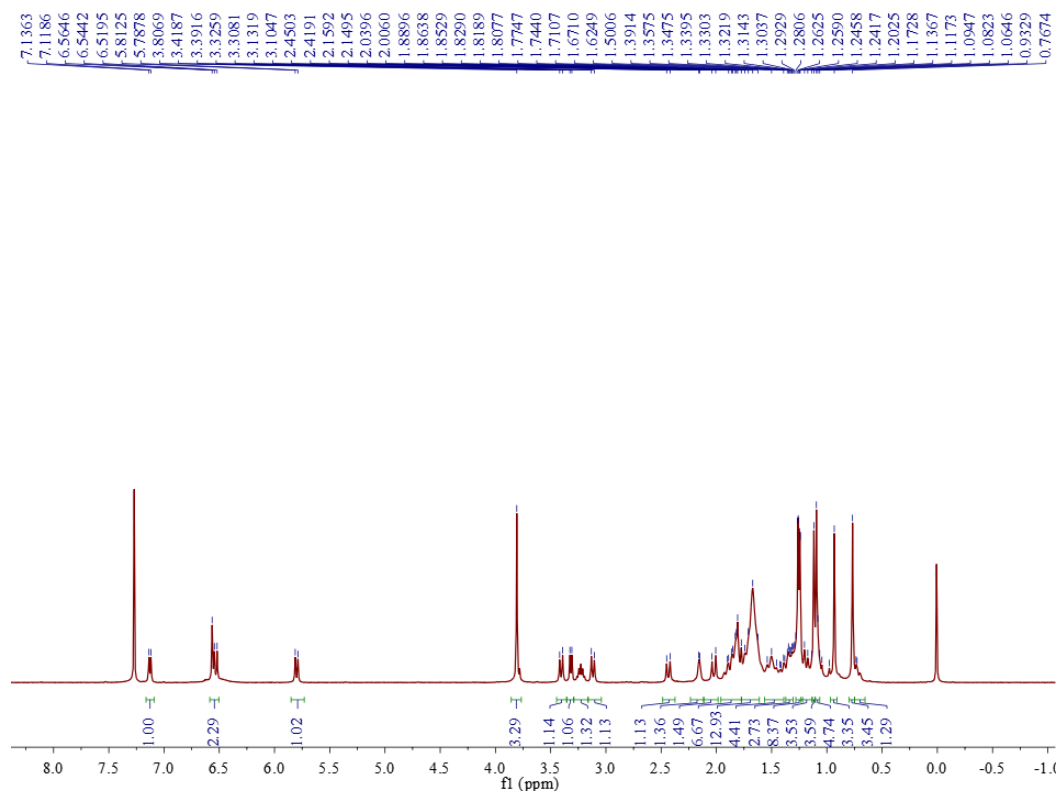

Figure S42. <sup>1</sup>H NMR spectrum of 1a in CDCl<sub>3</sub> (400 MHz)



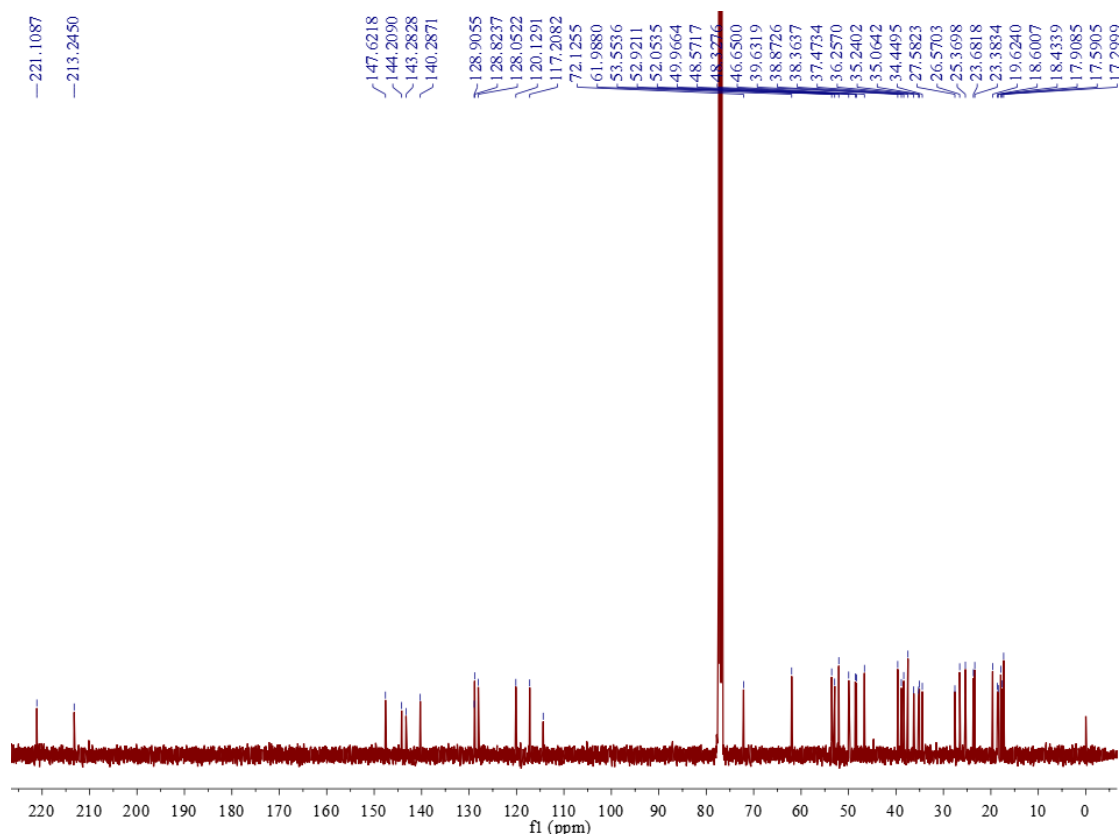

Figure S43.  $^{13}\text{C}$  NMR spectrum of **1a** in  $\text{CDCl}_3$  (100 MHz)

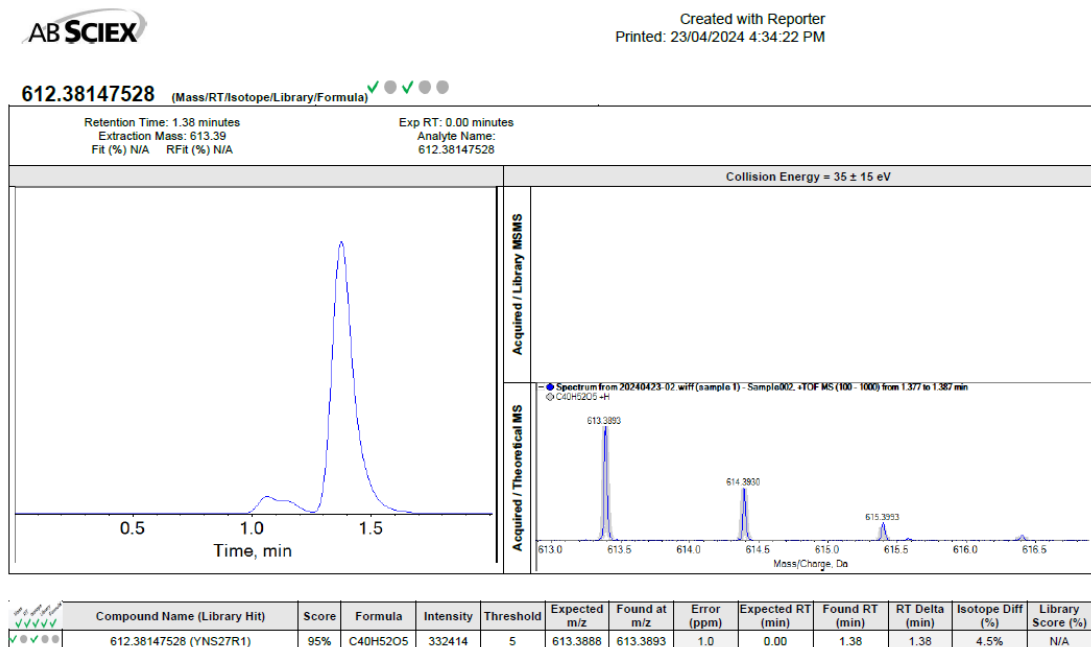

Figure S44. HRESIMS report of **1a**

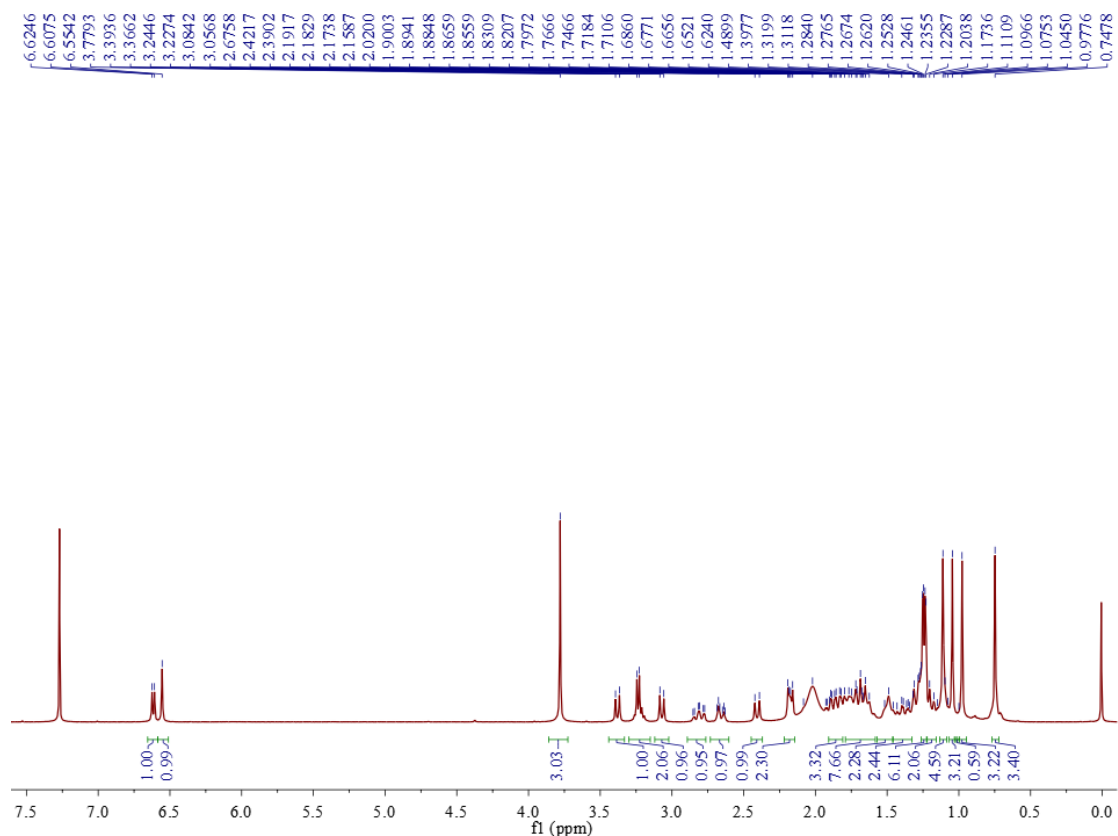

Figure S45.  $^1\text{H}$  NMR spectrum of **1b** in  $\text{CDCl}_3$  (400 MHz)

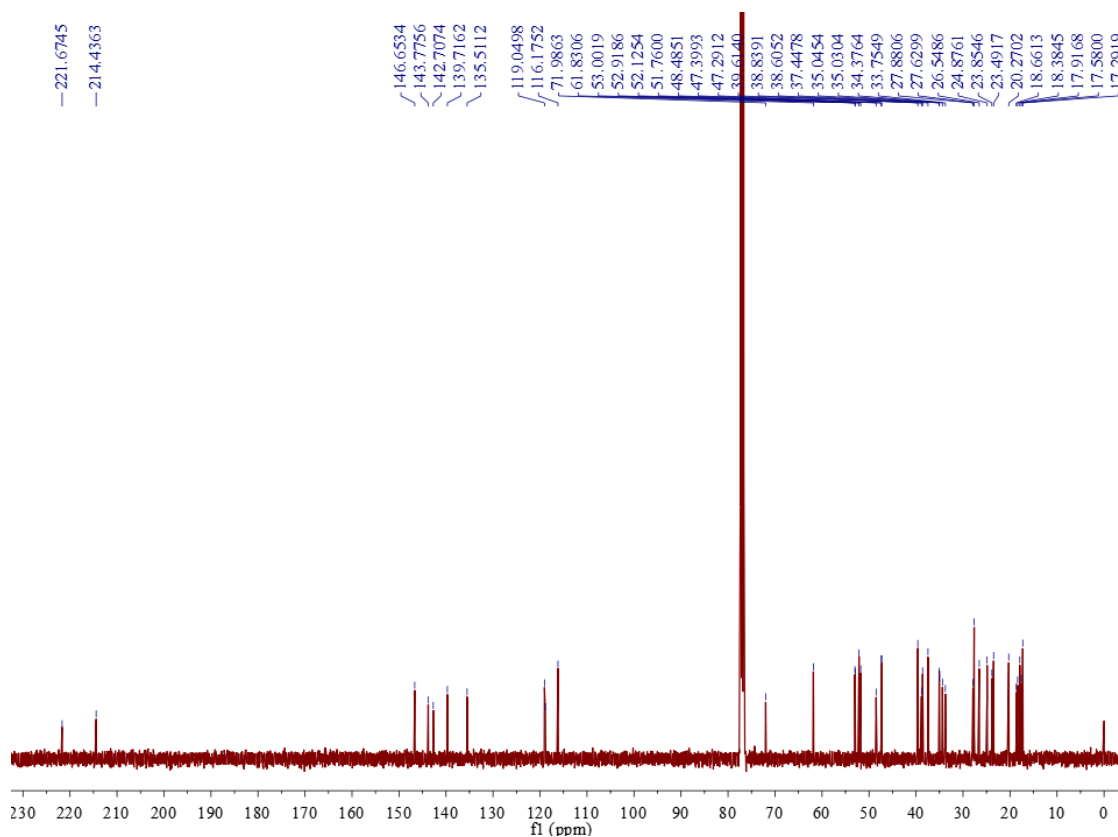

Figure S46.  $^{13}\text{C}$  NMR spectrum of **1b** in  $\text{CDCl}_3$  (100 MHz)

614.39712536 (Mass/RT/Isotope/Library/Formular) ✓●●●●

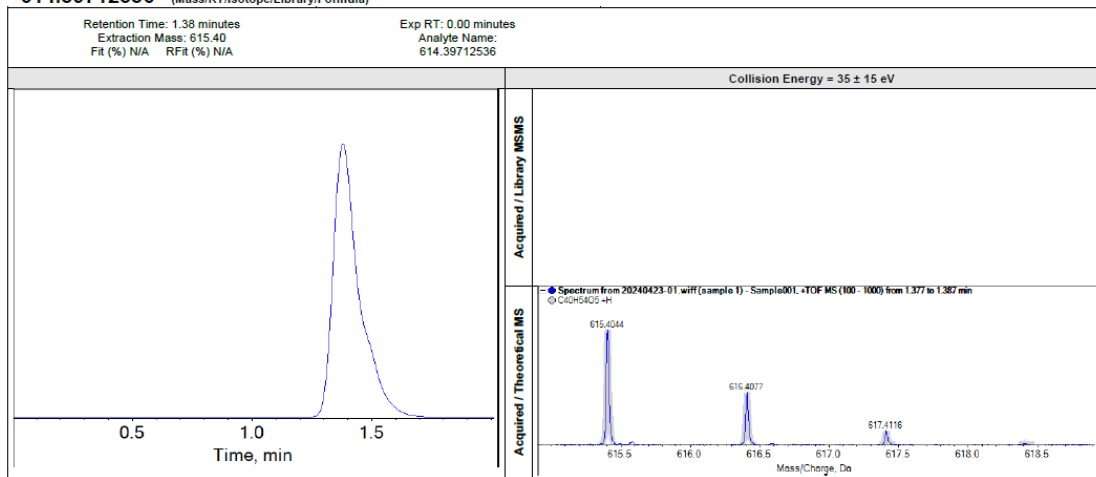

| Compound Name (Library Hit) | Score | Formula                                        | Intensity | Threshold | Expected m/z | Found at m/z | Error (ppm) | Expected RT (min) | Found RT (min) | RT Delta (min) | Isotope Diff (%) | Library Score (%) |
|-----------------------------|-------|------------------------------------------------|-----------|-----------|--------------|--------------|-------------|-------------------|----------------|----------------|------------------|-------------------|
| 614.39712536 (YNS27R2)      | 99%   | C <sub>40</sub> H <sub>54</sub> O <sub>5</sub> | 237216    | 5         | 615.4044     | 615.4044     | -0.1        | 0.00              | 1.38           | 1.38           | 0.9%             | N/A               |

Figure S47. HRESIMS report of 1b
